# Supplementary material for: CREPT Disarms the Inhibitory Activity of HDAC1 on Oncogene Expression to Promote Tumorigenesis
Source: MDPI journal article supplement (doi:10.3390/cancers14194797), 2022-09-30

Figure S1A

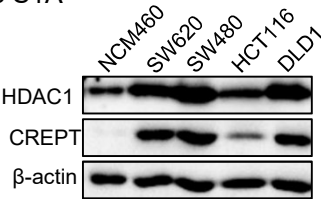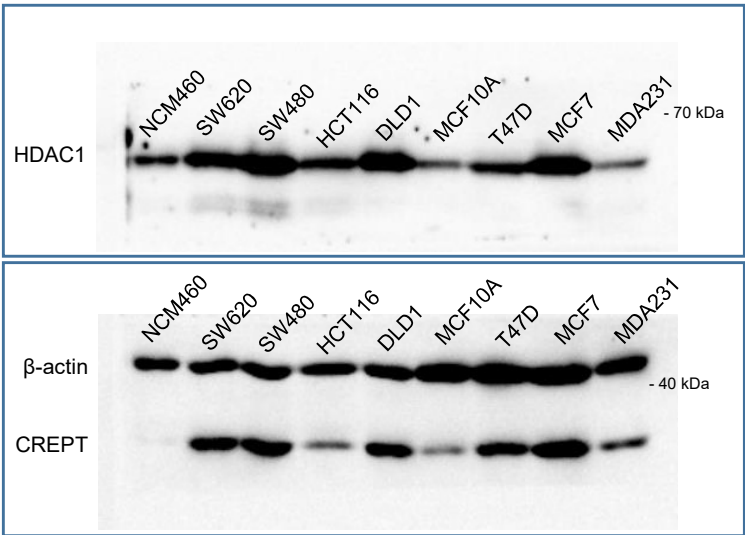

Supplementary Figure S1A

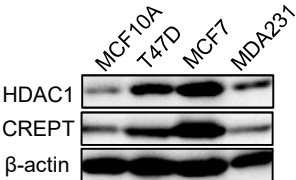

Figure S1D

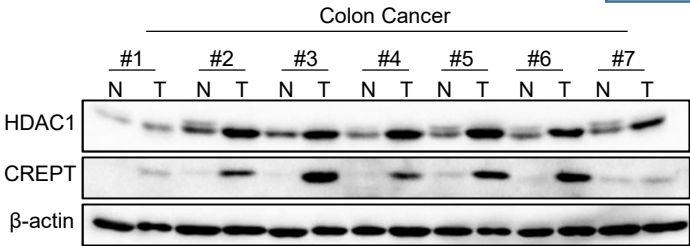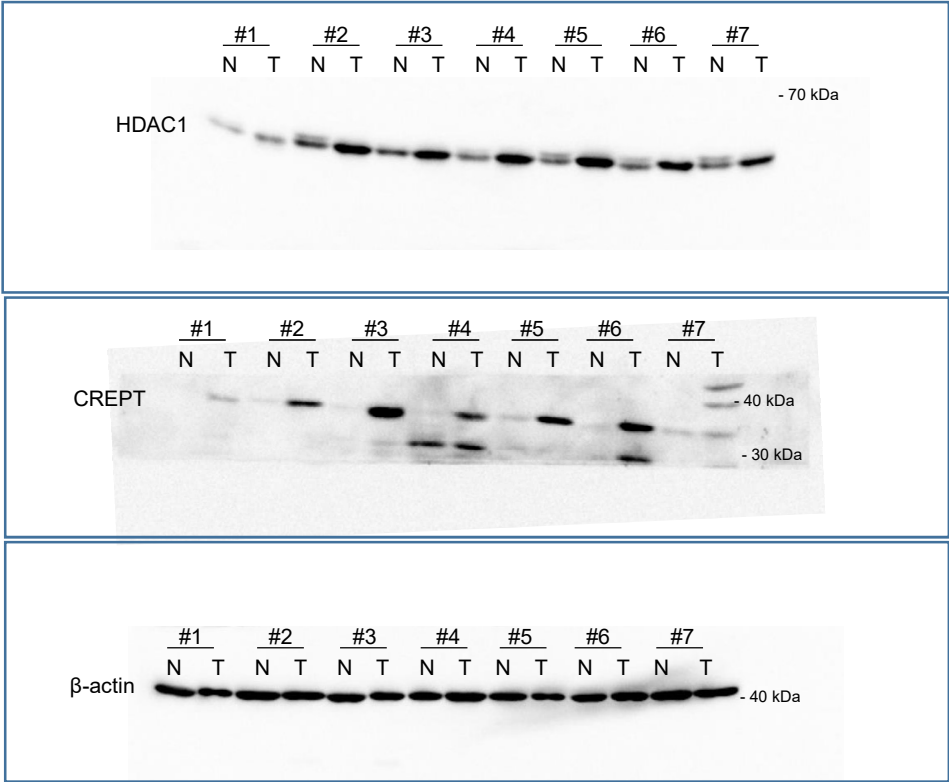

Figure S2A

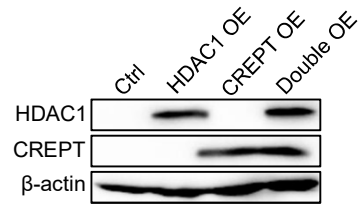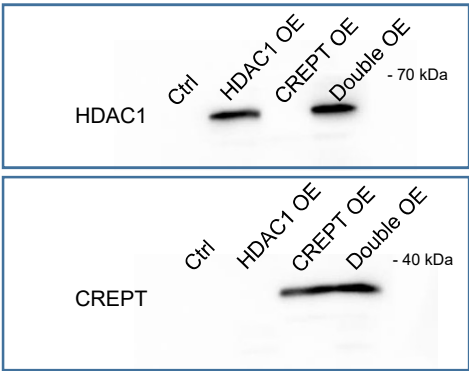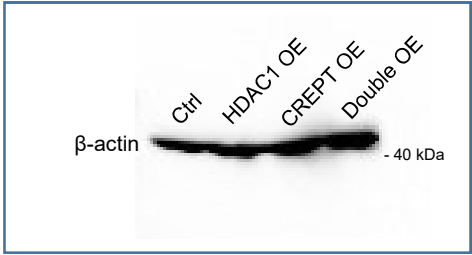

Figure S2E

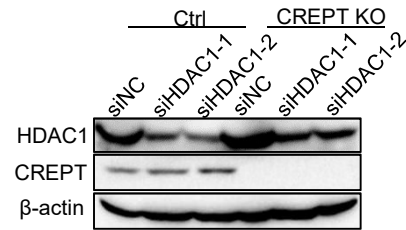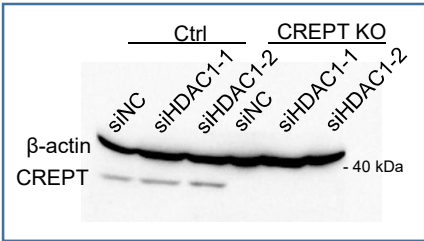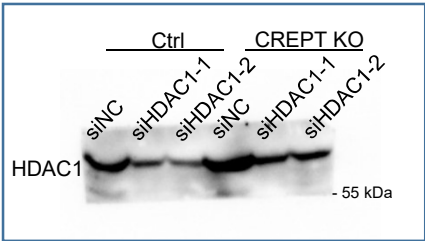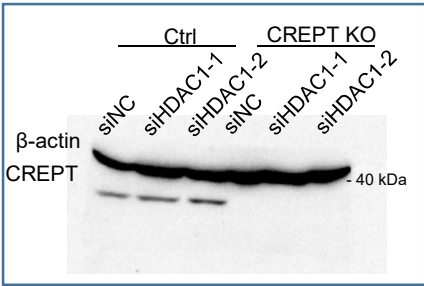

Figure S2L

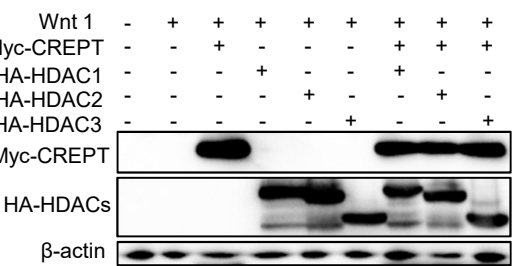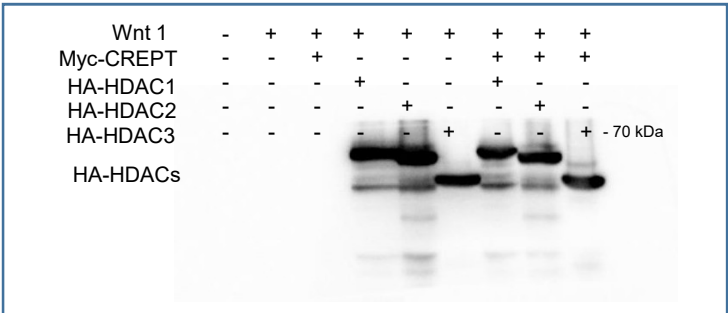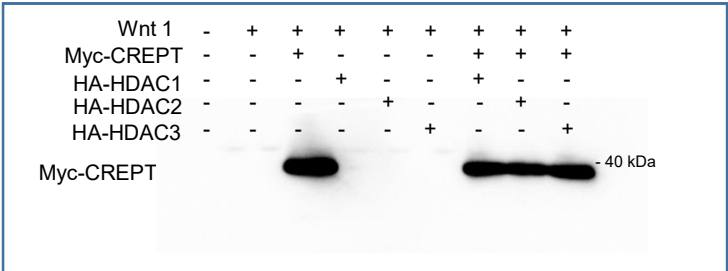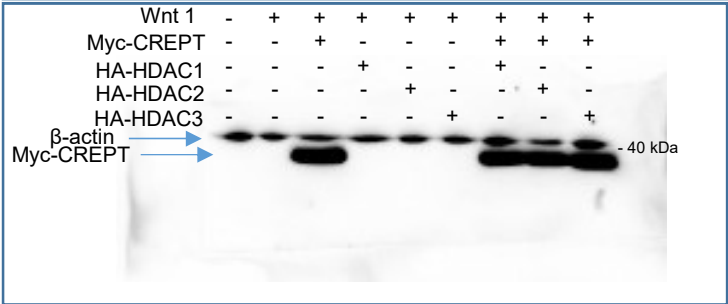

Figure S3A

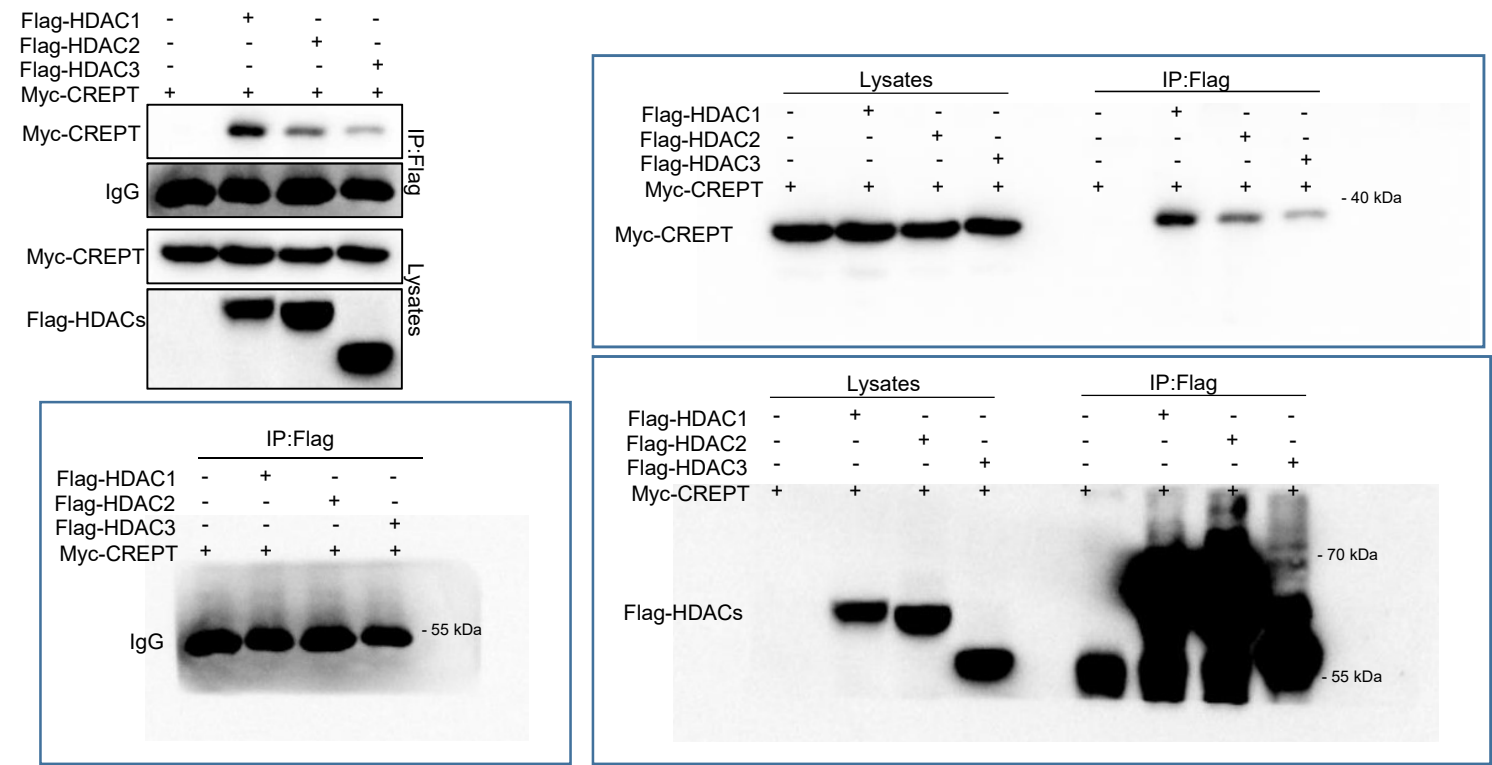

Figure S3B

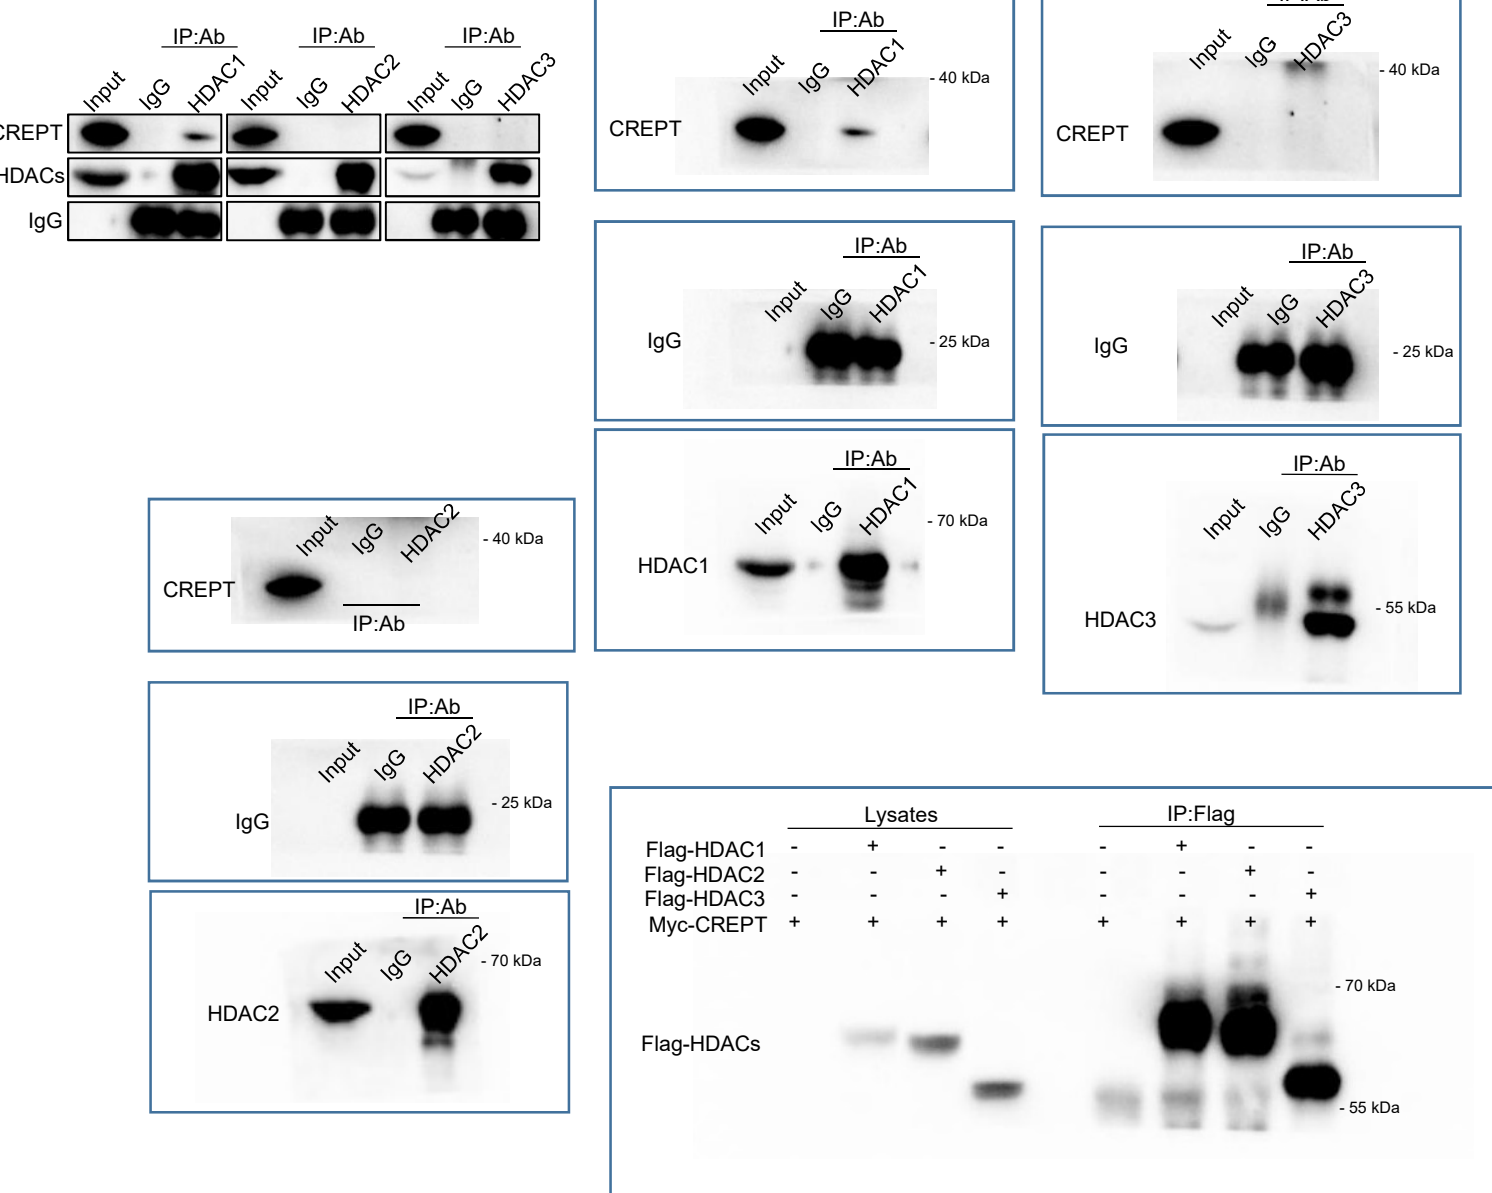

Figure S3C

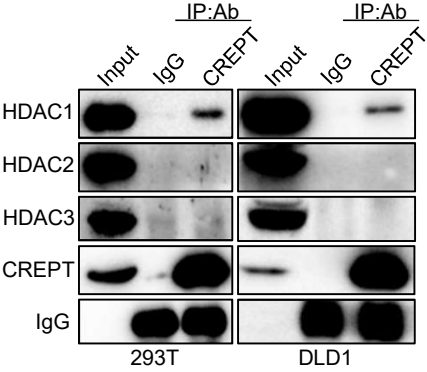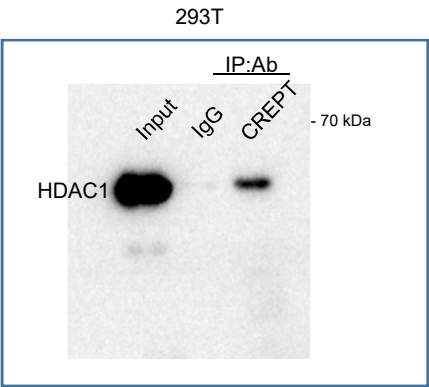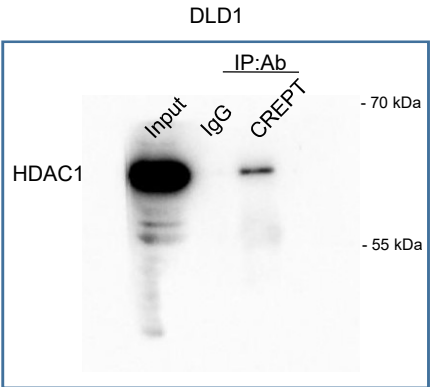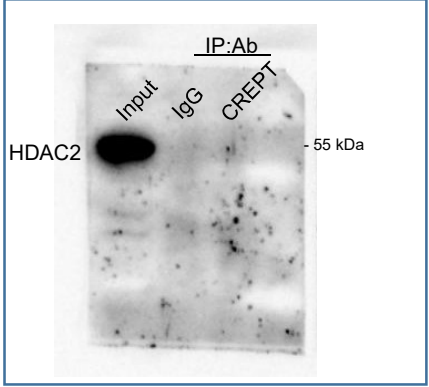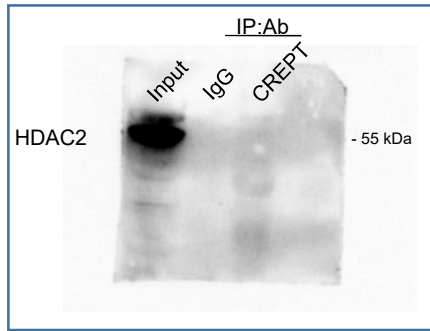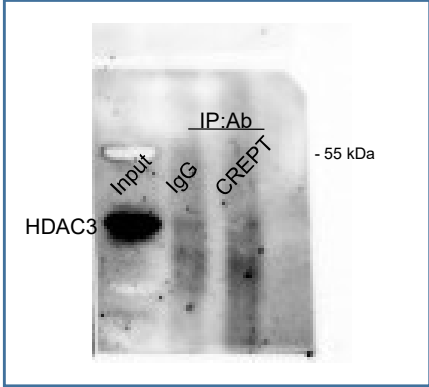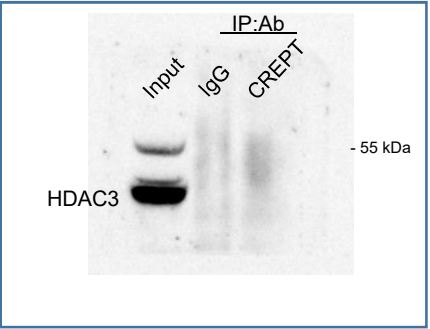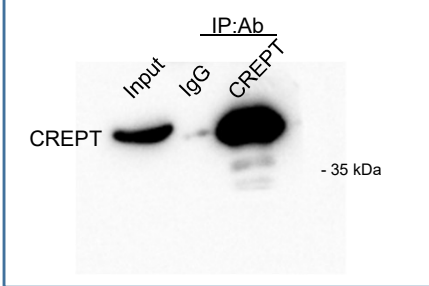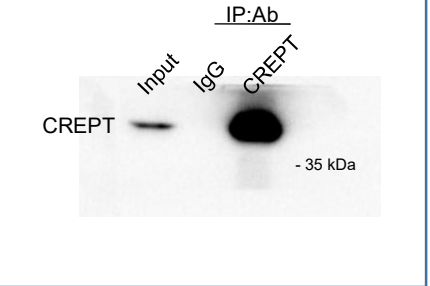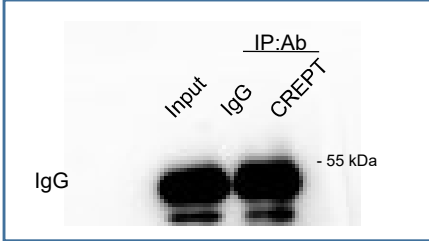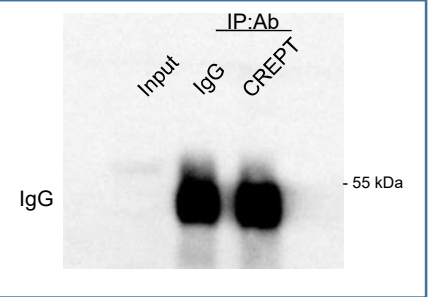

Figure S3E

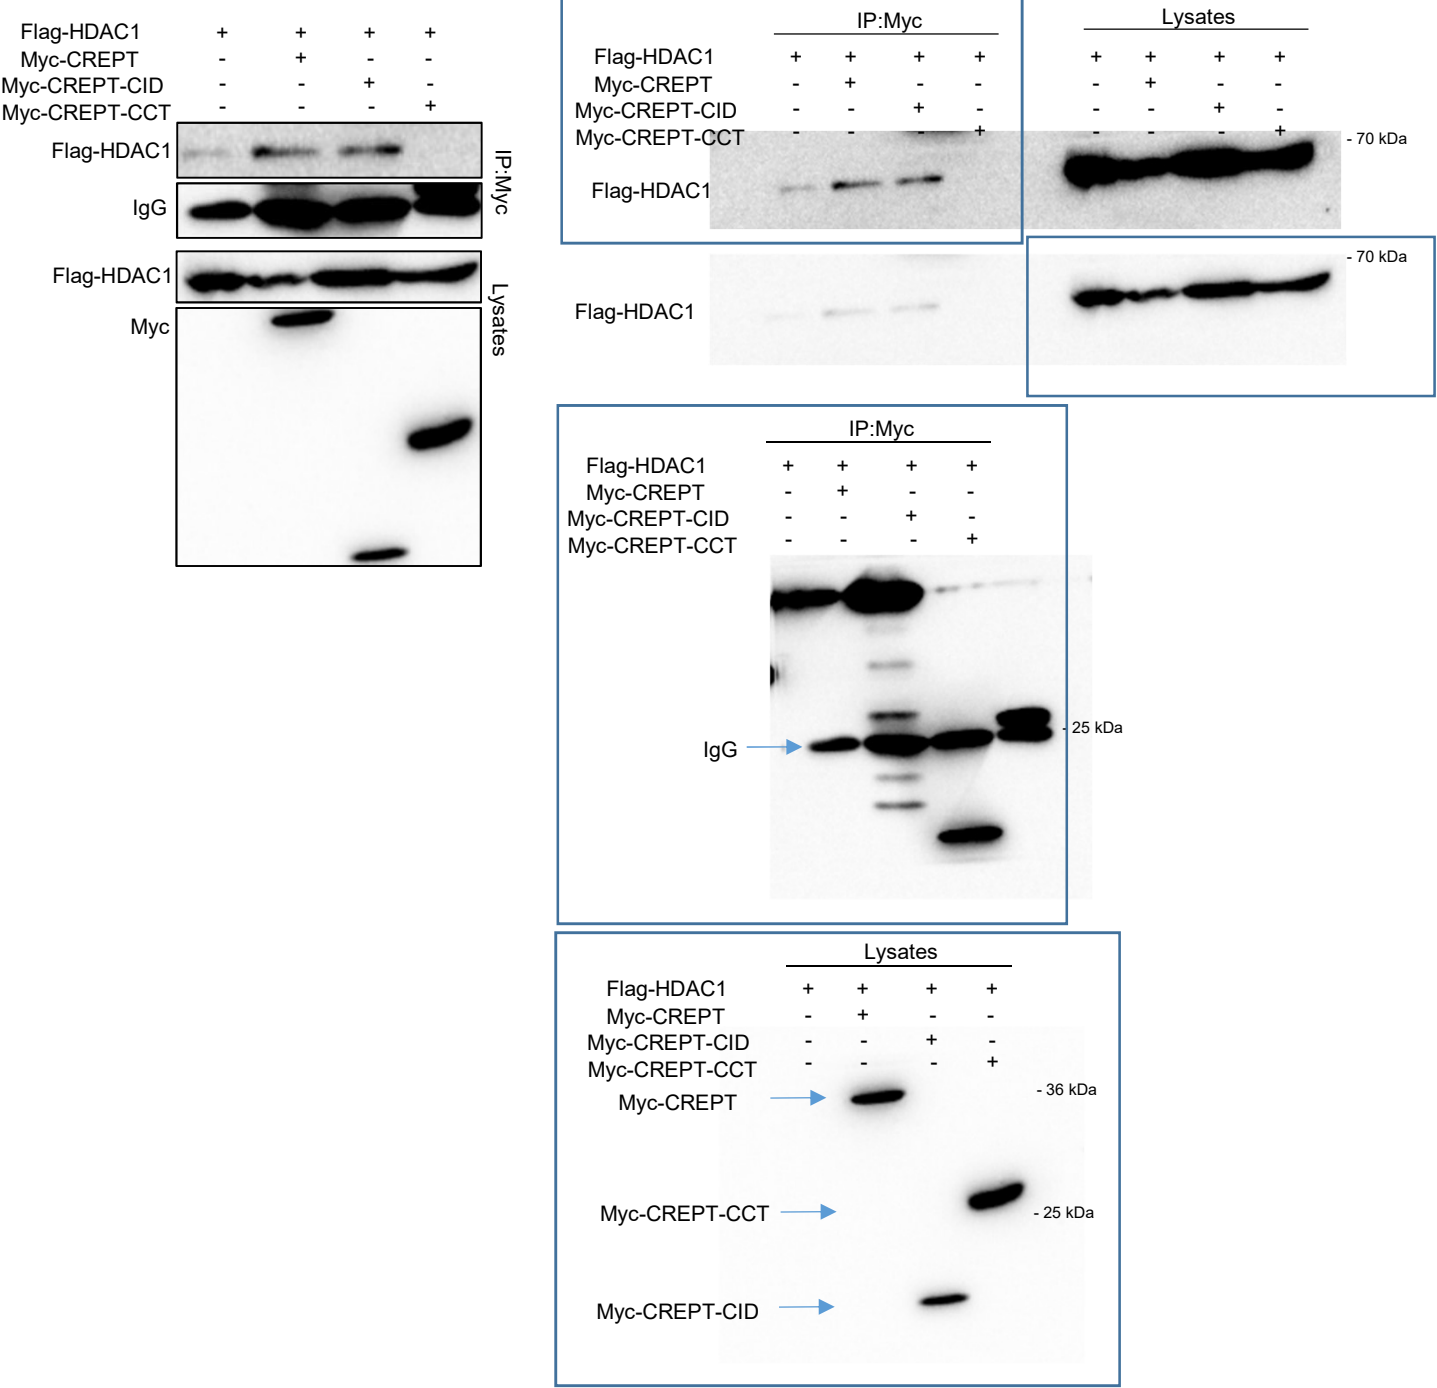

Figure S3F

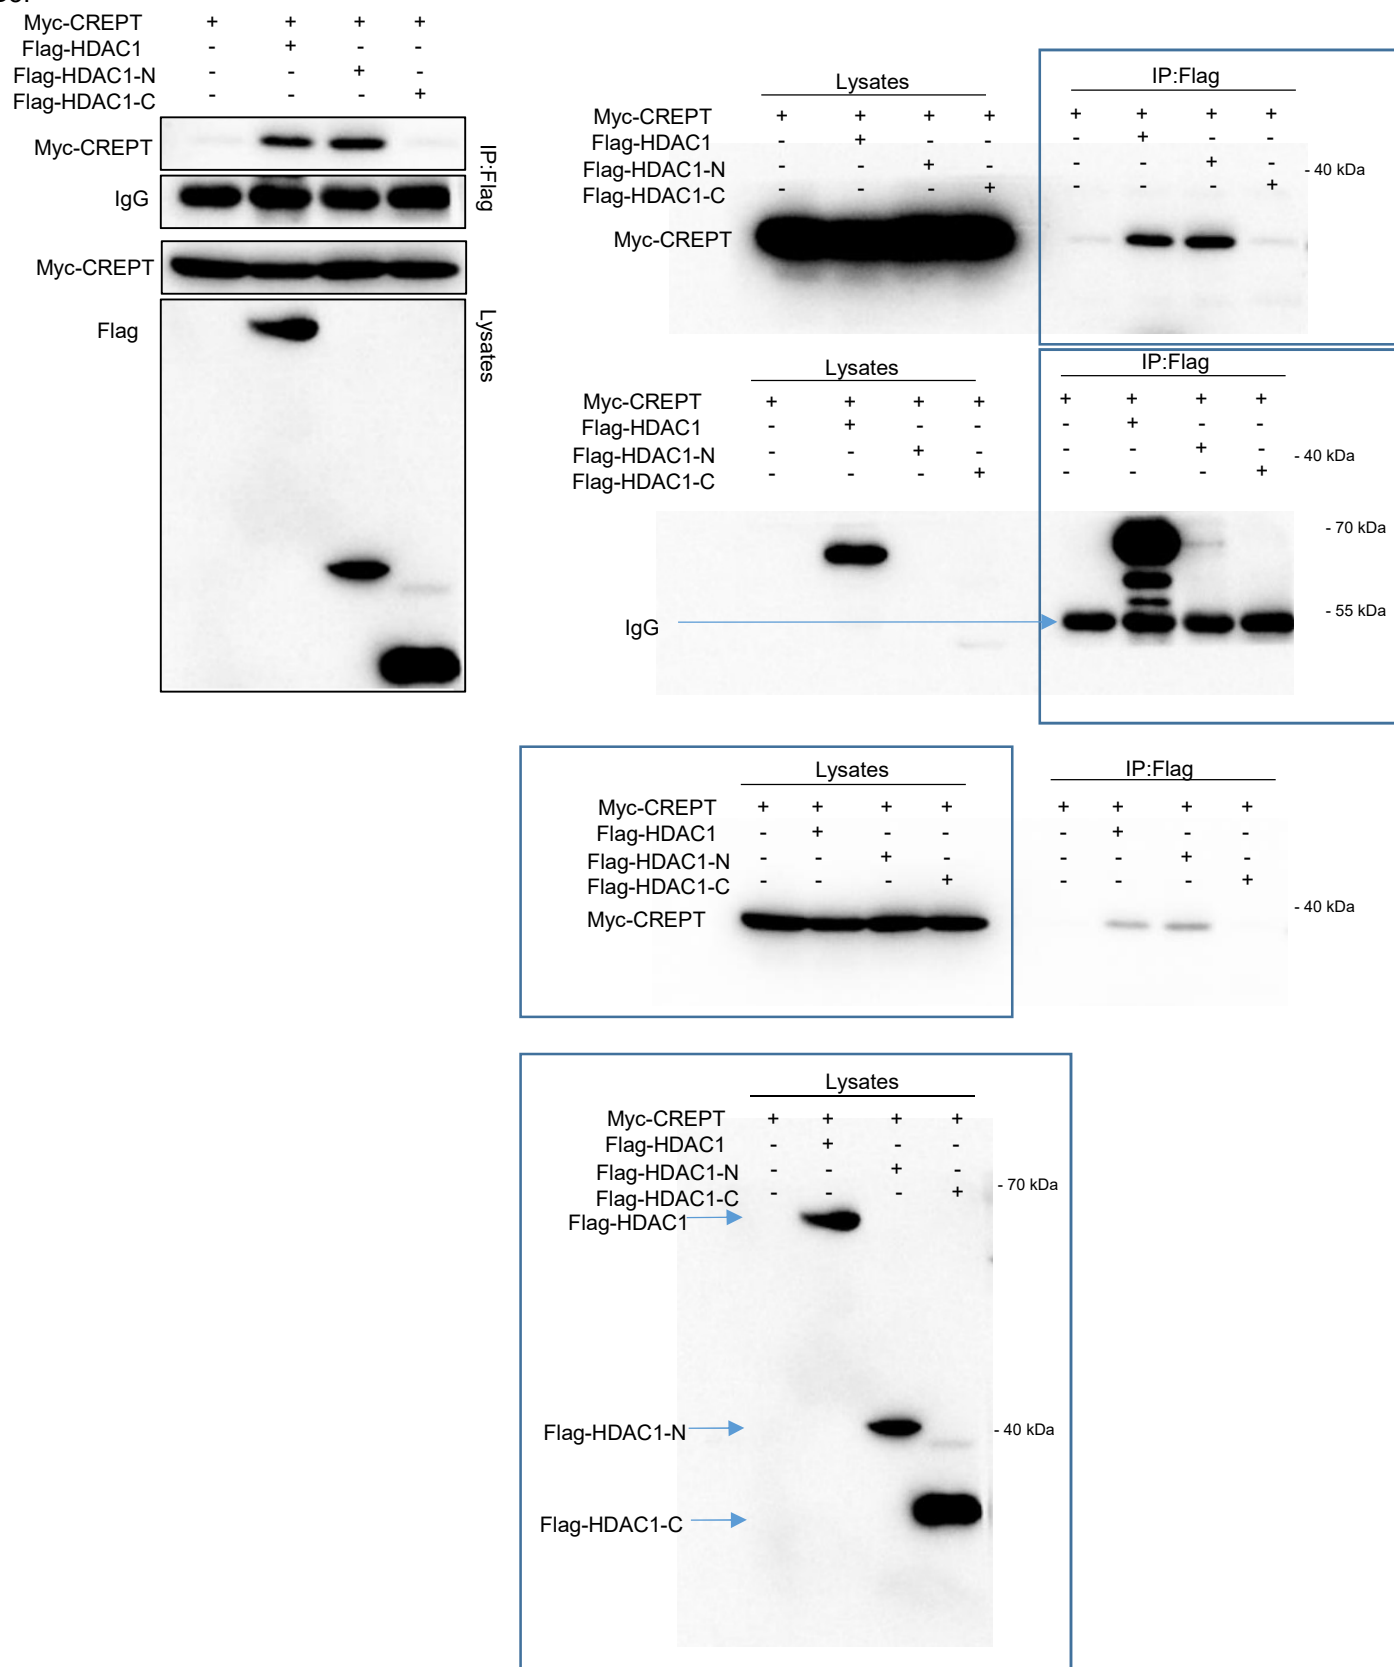

Figure S4B

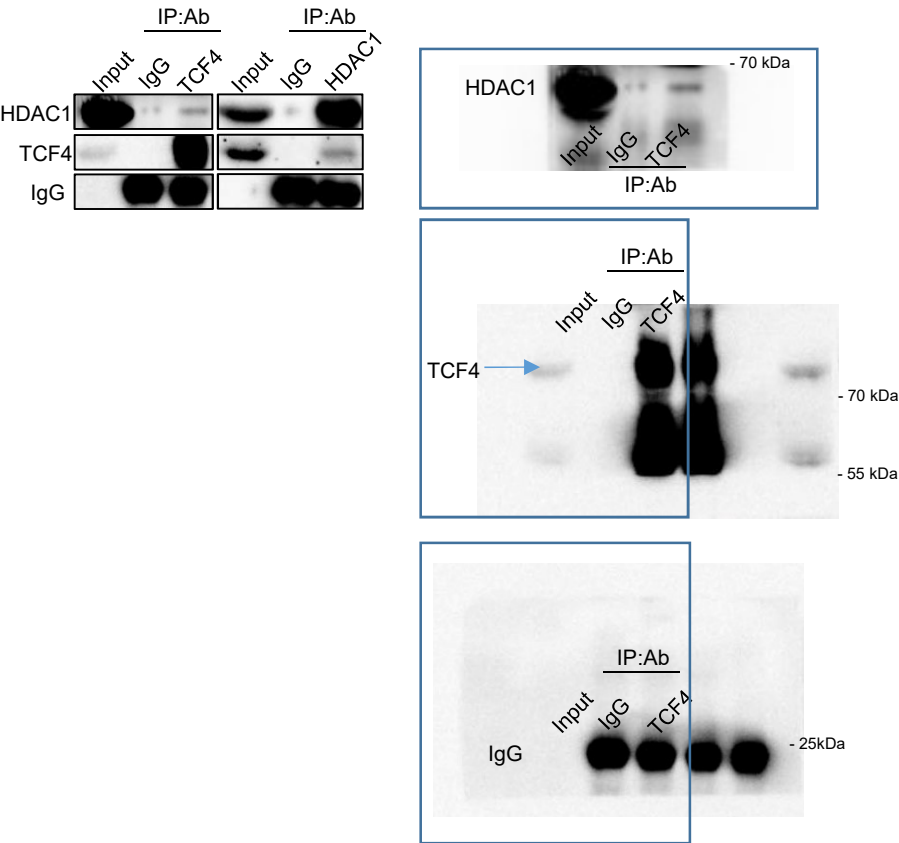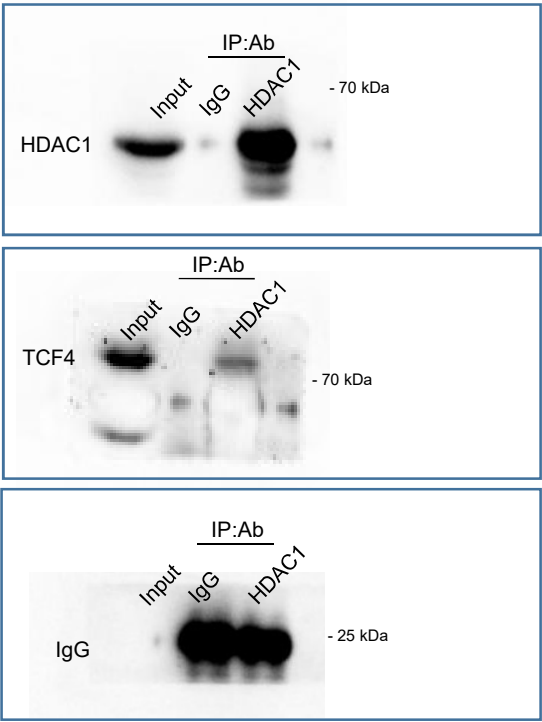

This samples were same with Fig.3B (IP:HDAC1)  
The Molecular Wt. of TCF4 antibody:58,79kDa

Figure S4C

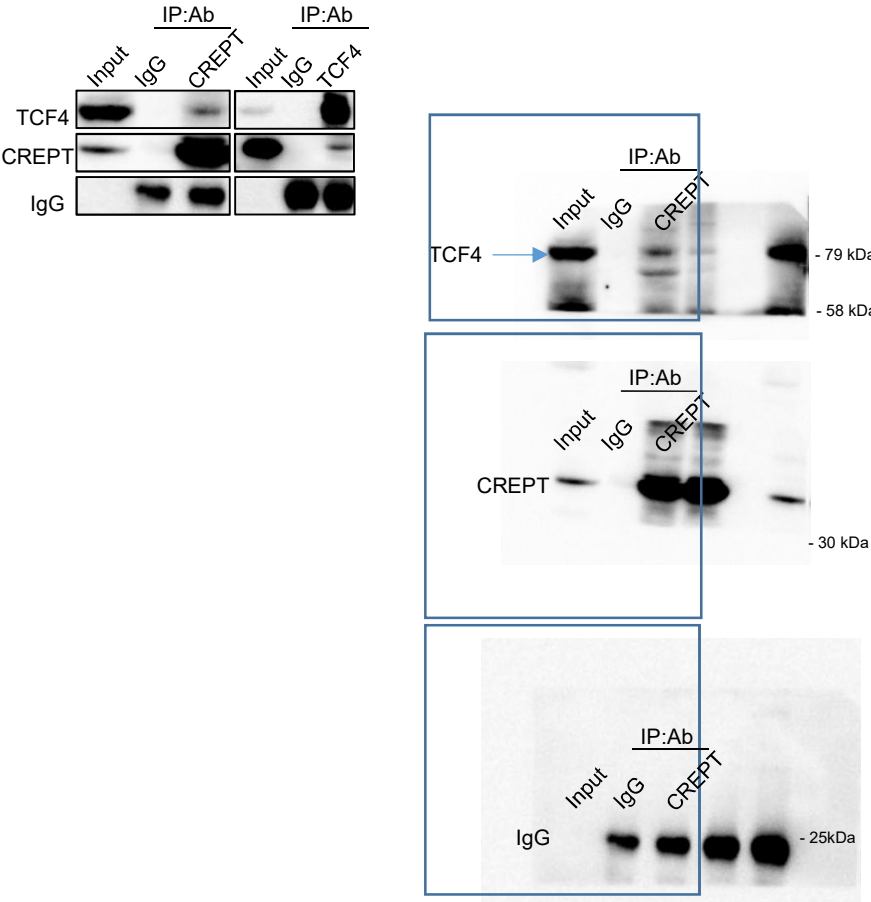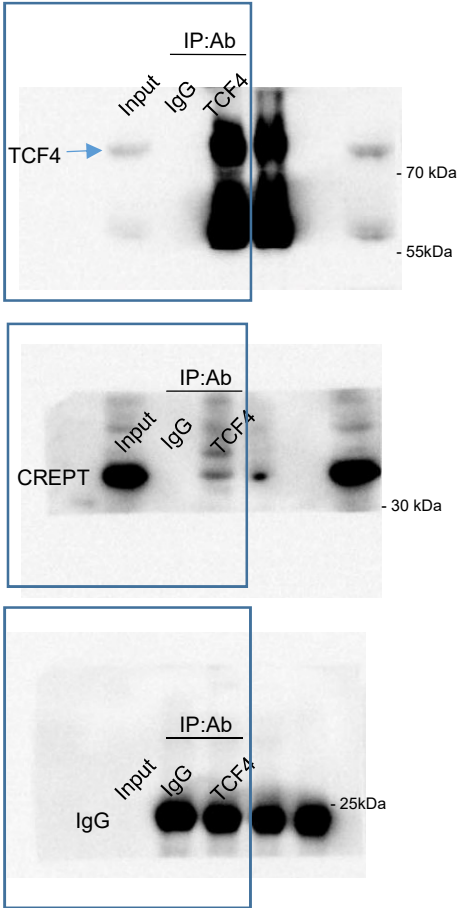

This samples were same with Fig.4B (IP:TCF4)



Figure S4D

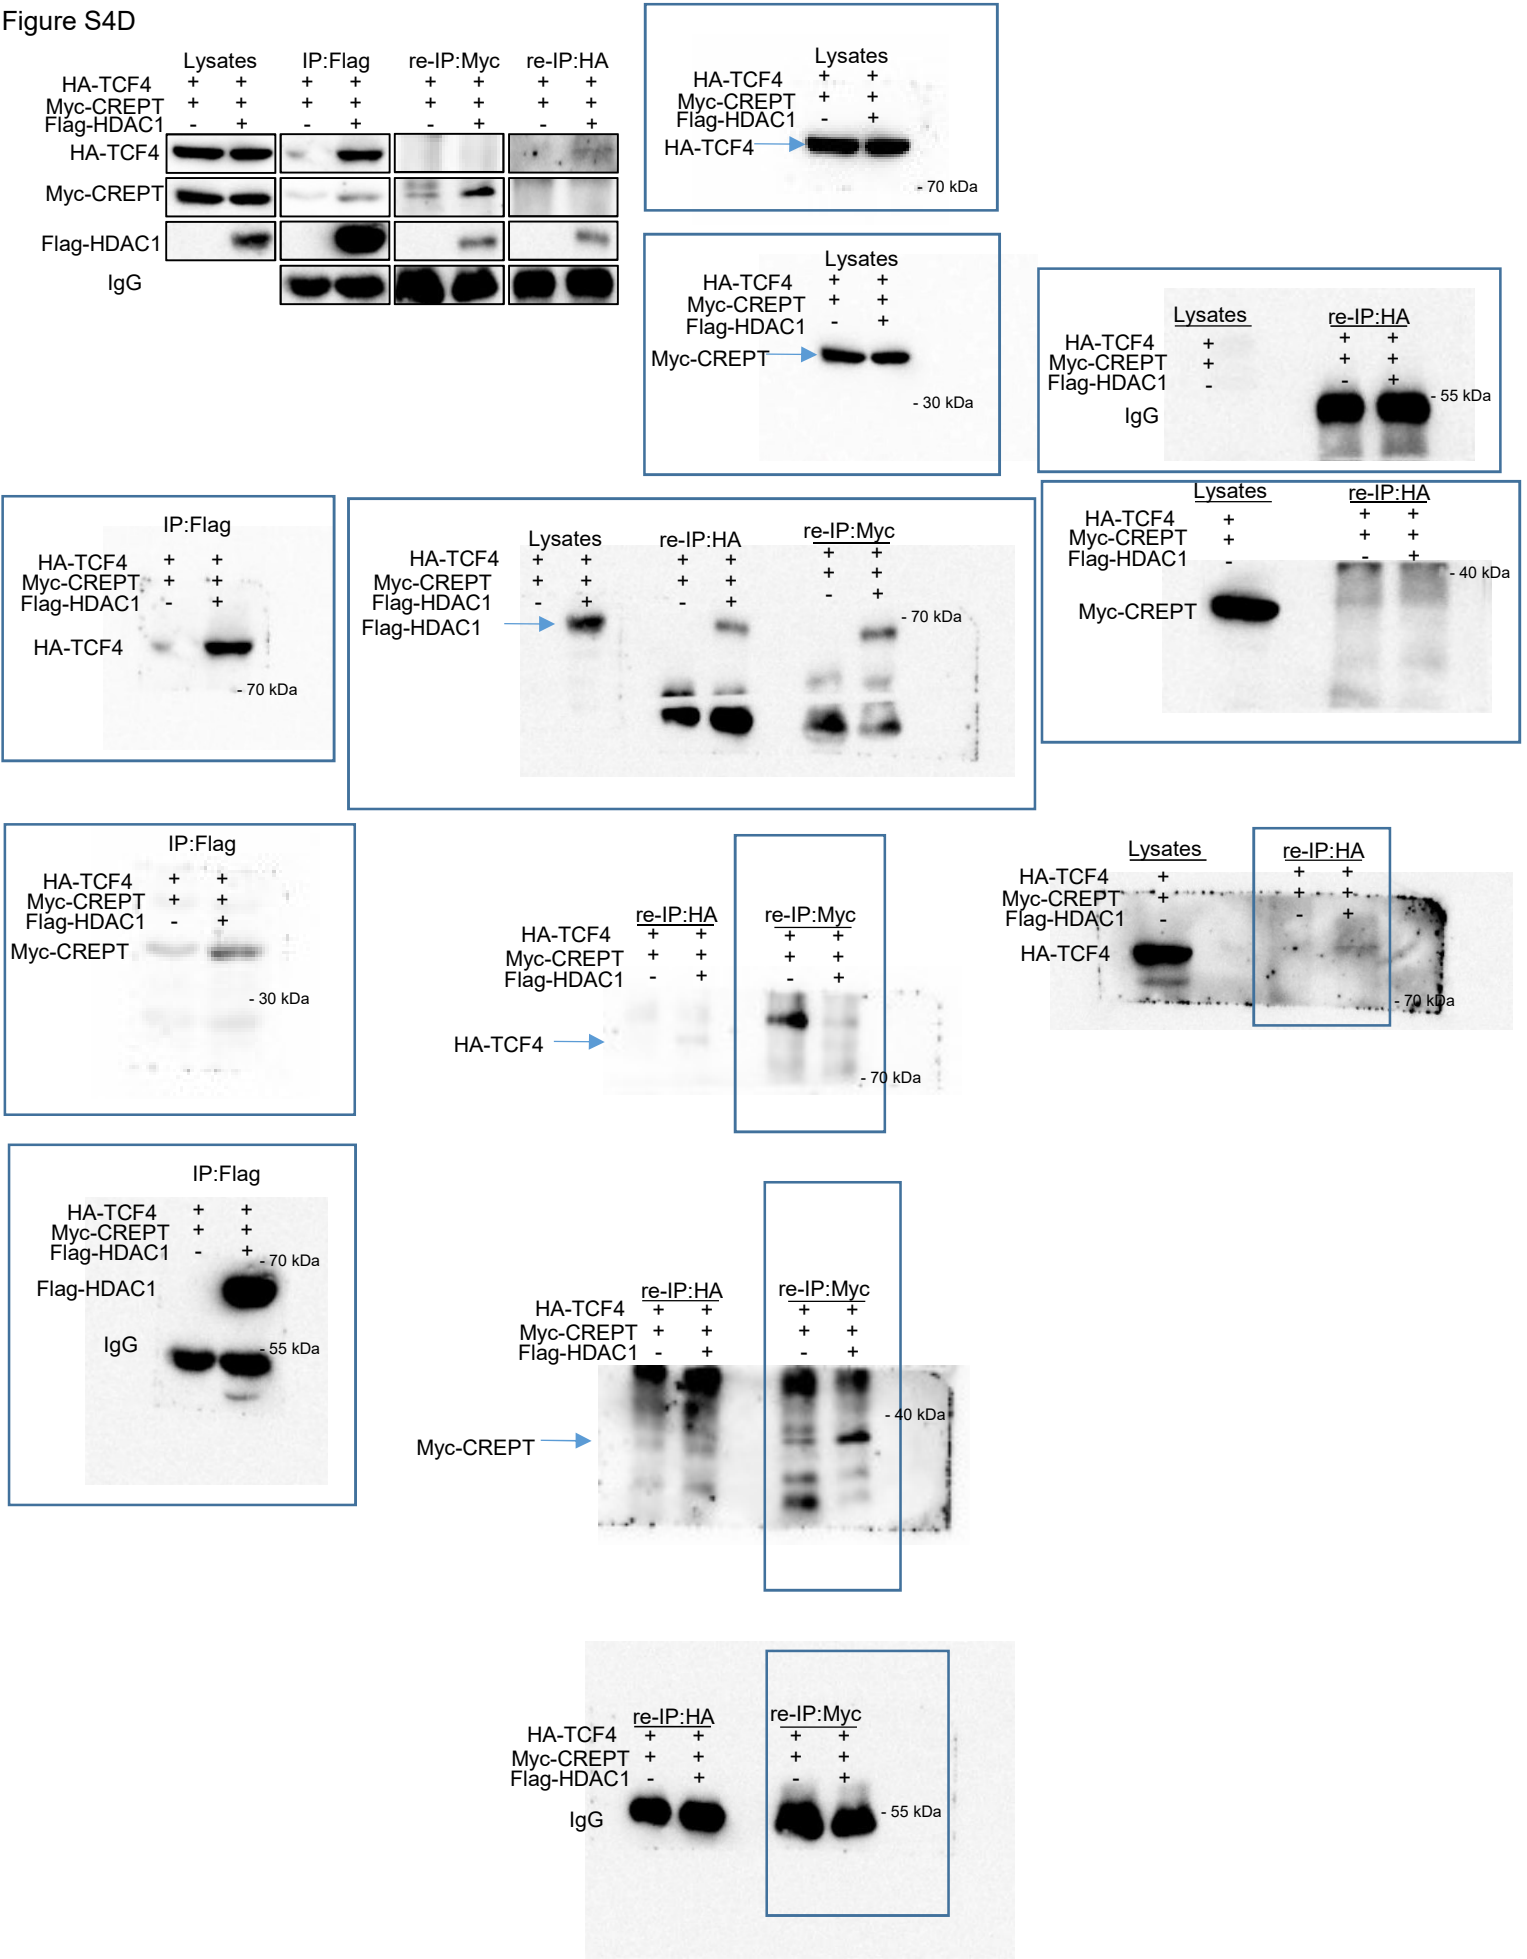



Figure S4E

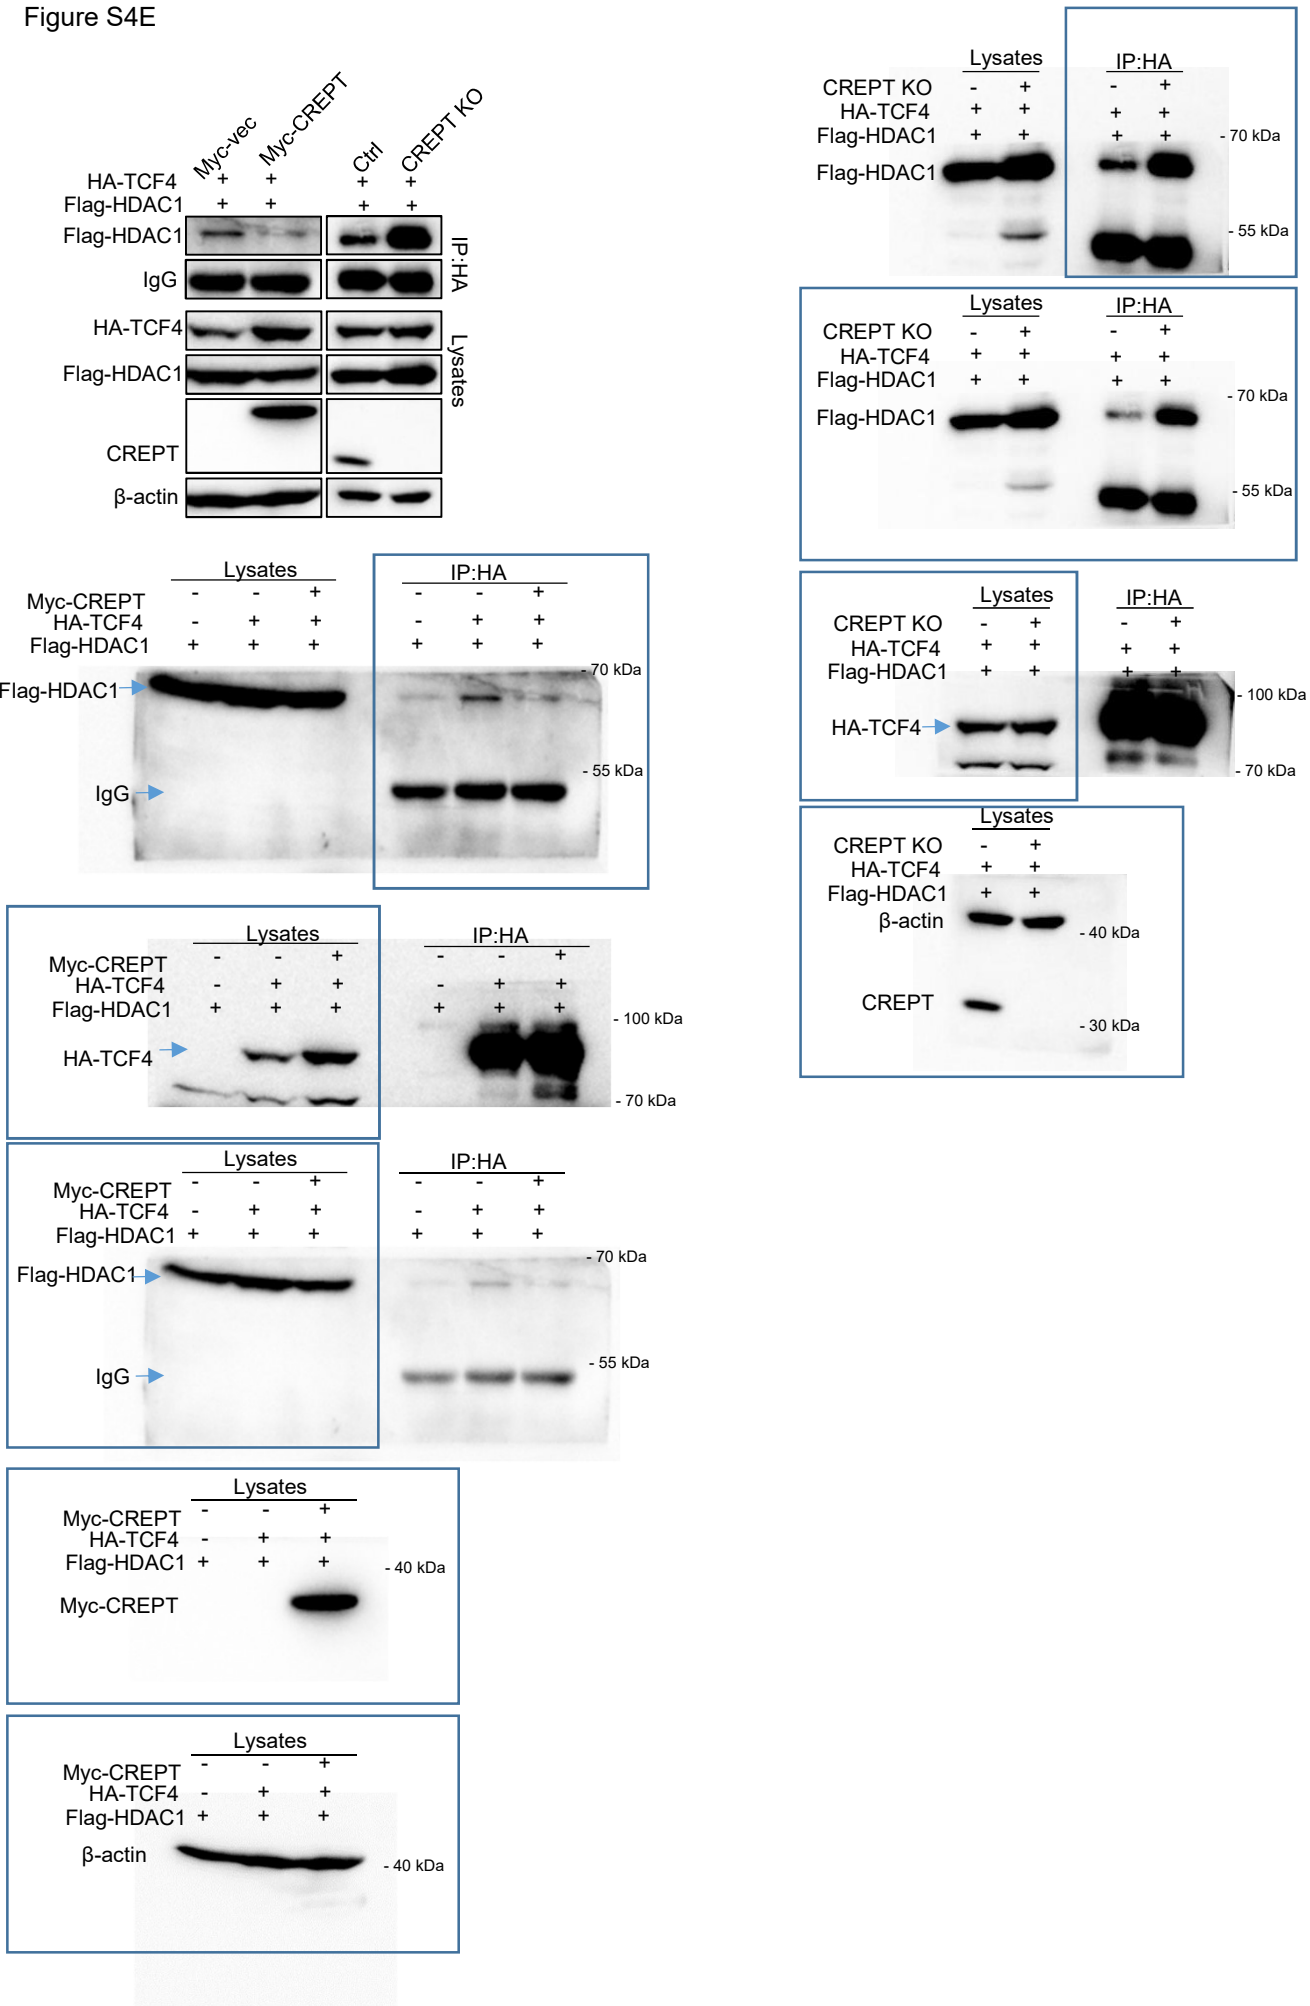

Figure S4F

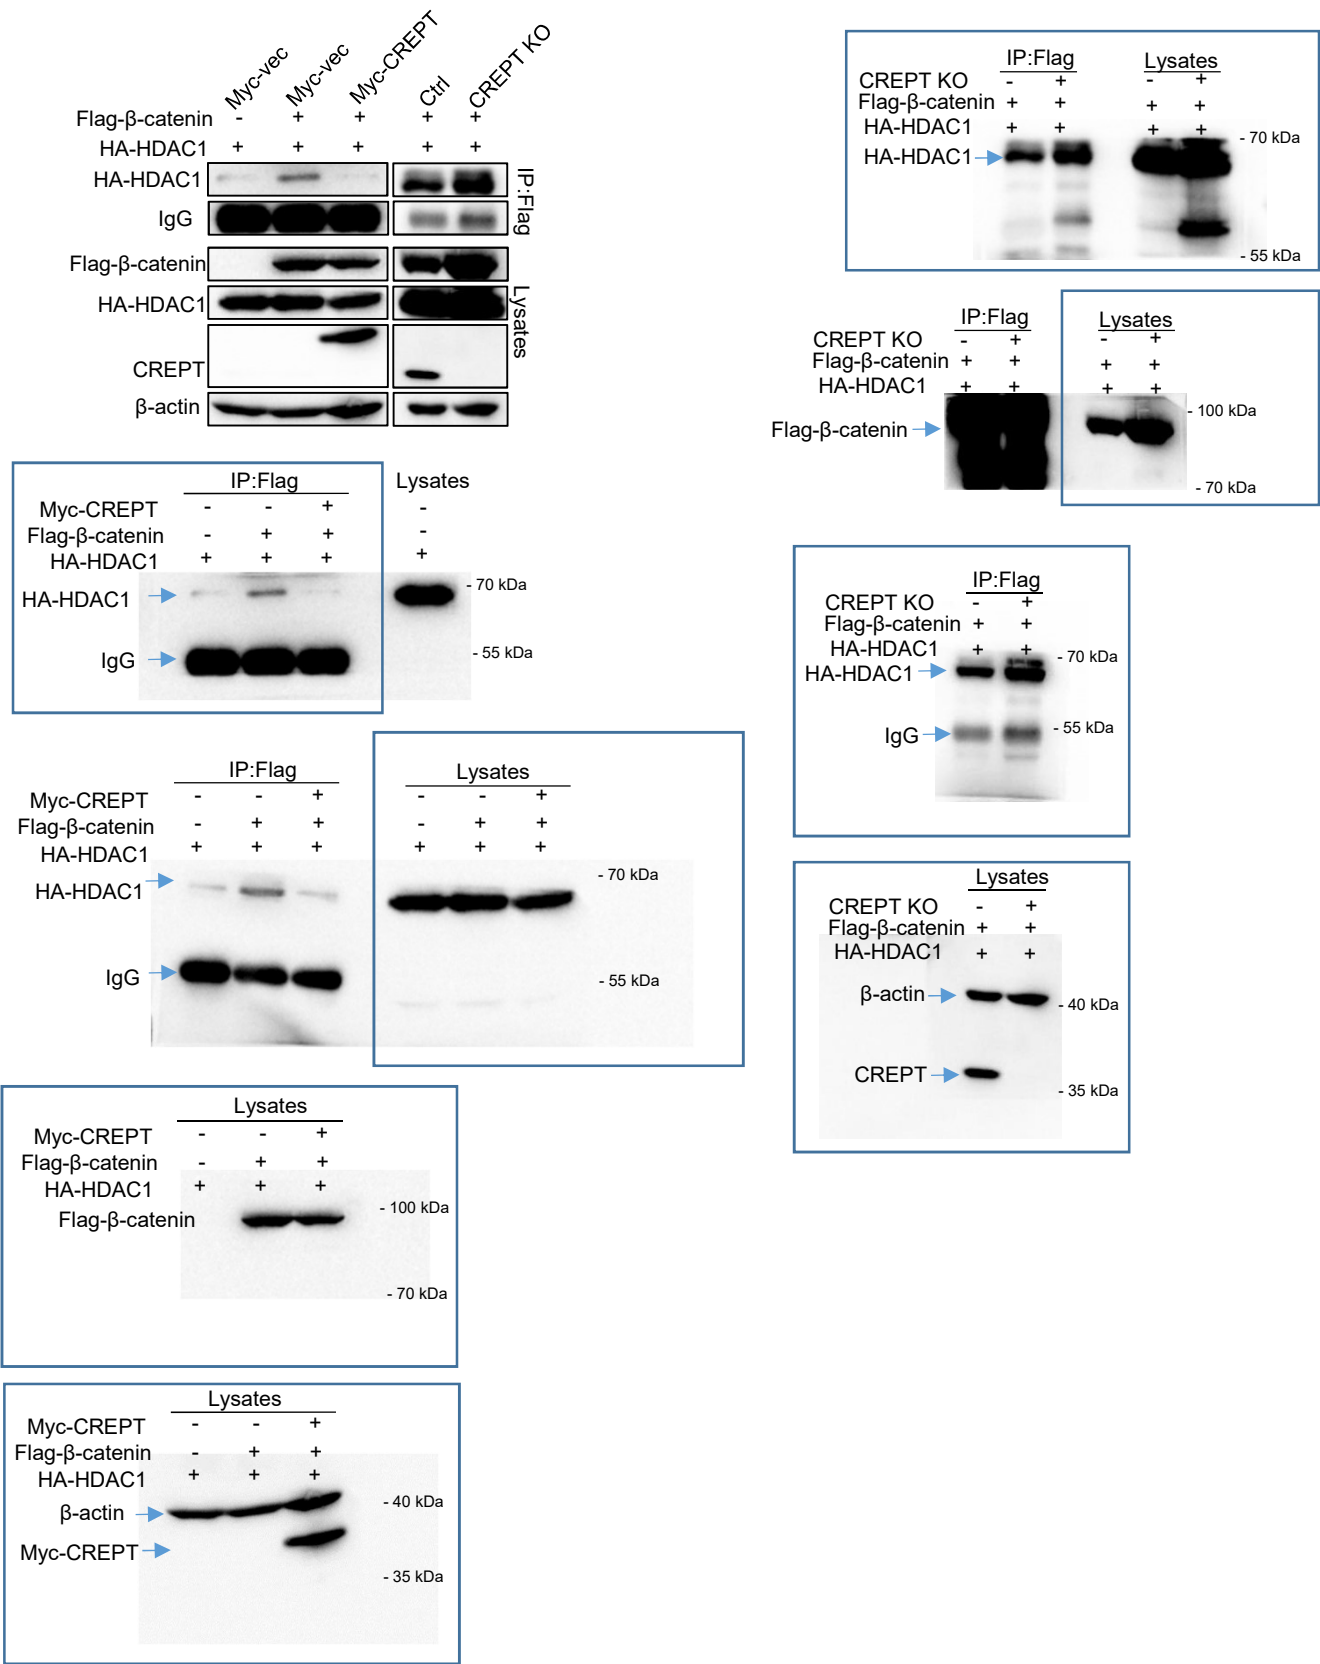

Figure S4G

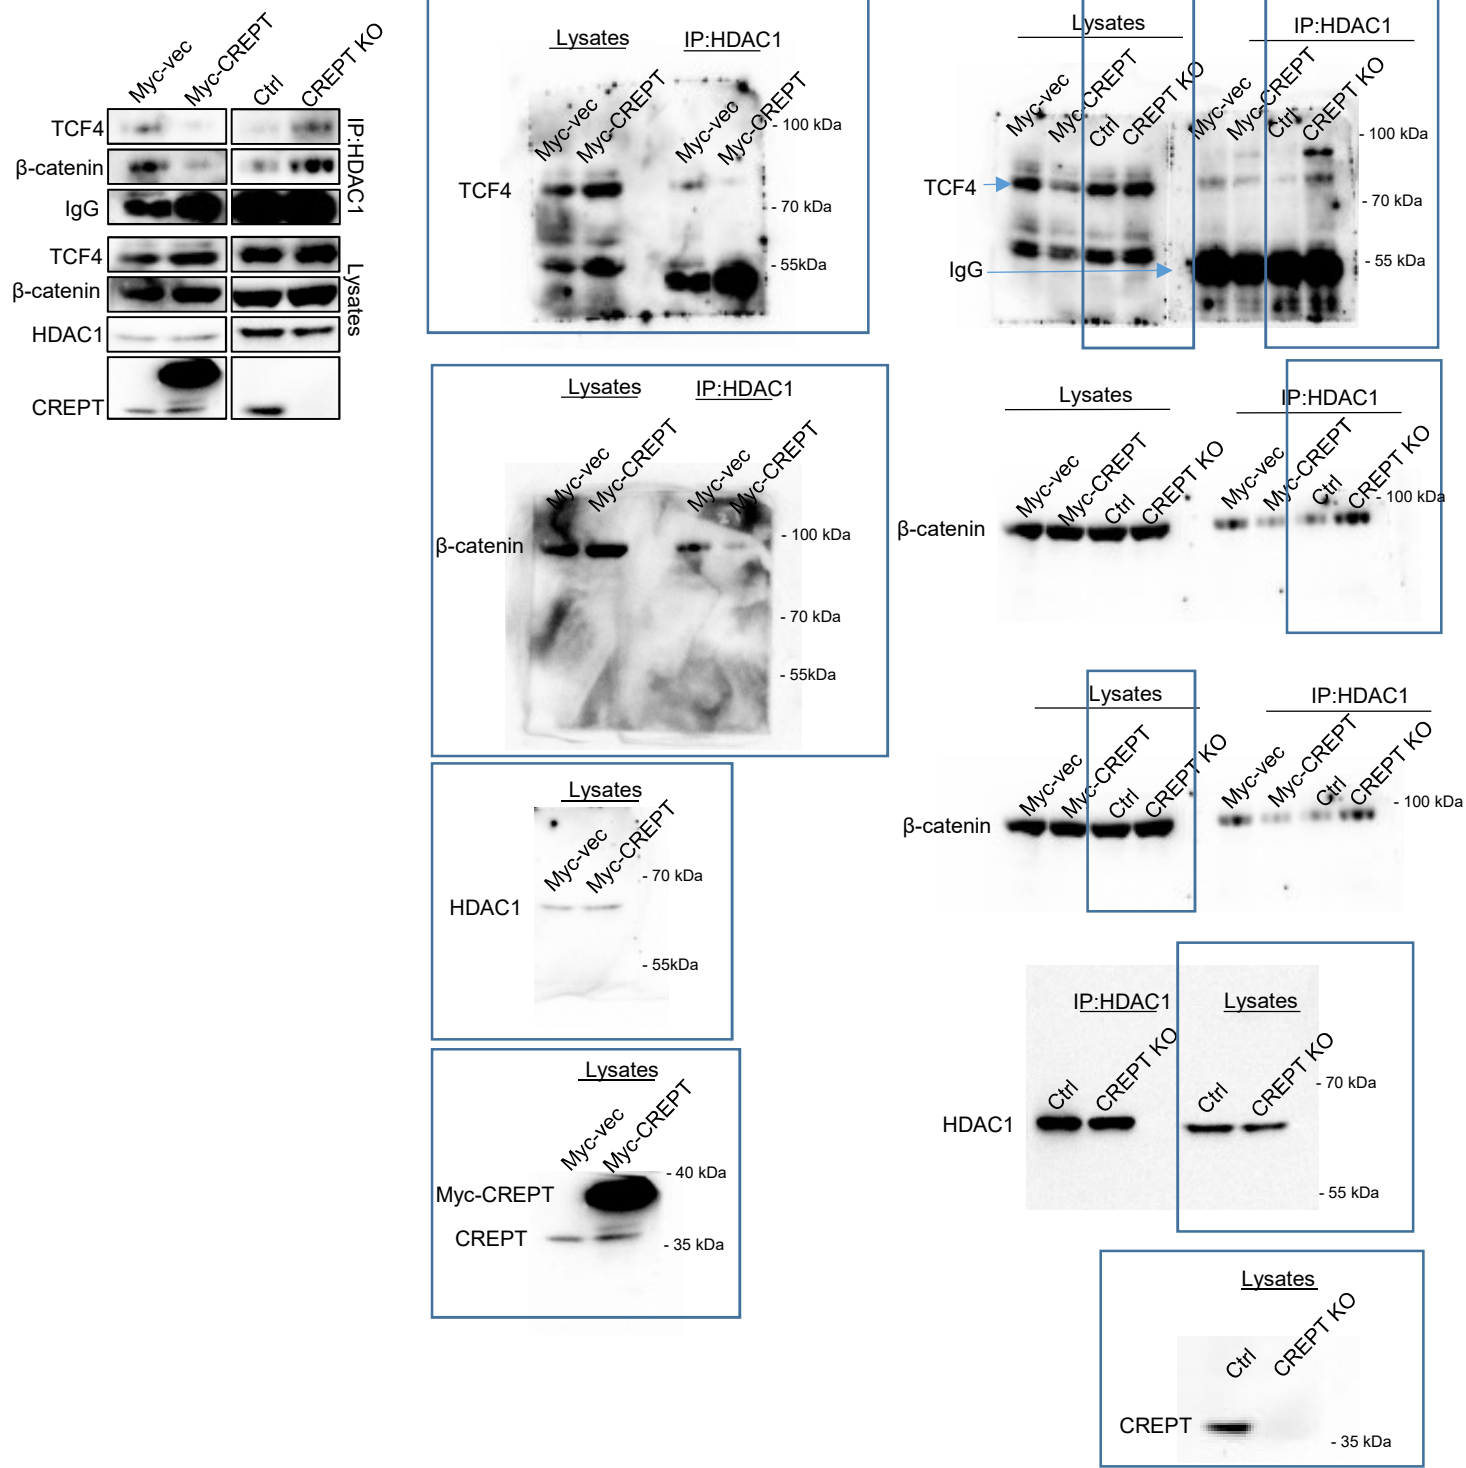

Figure S4H

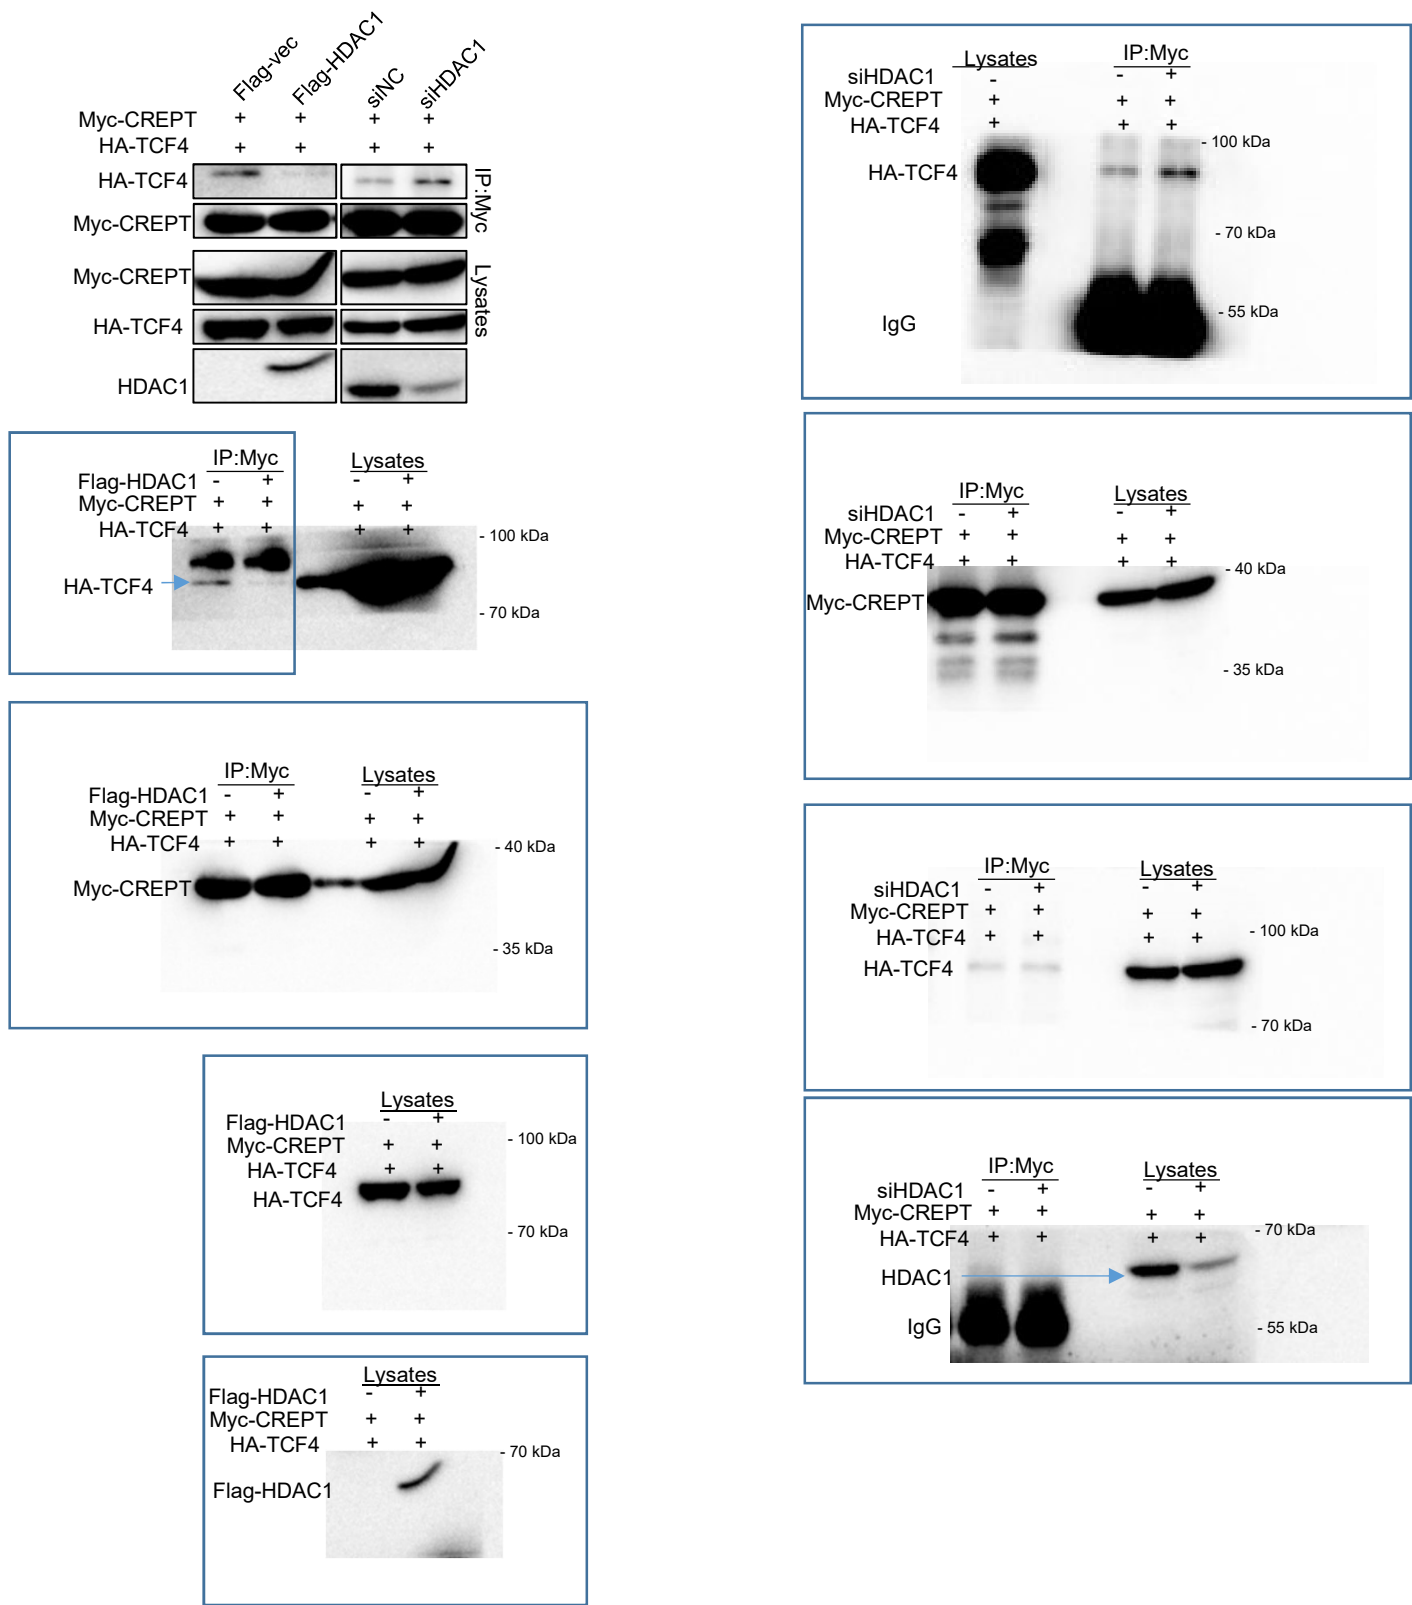

Figure S4I

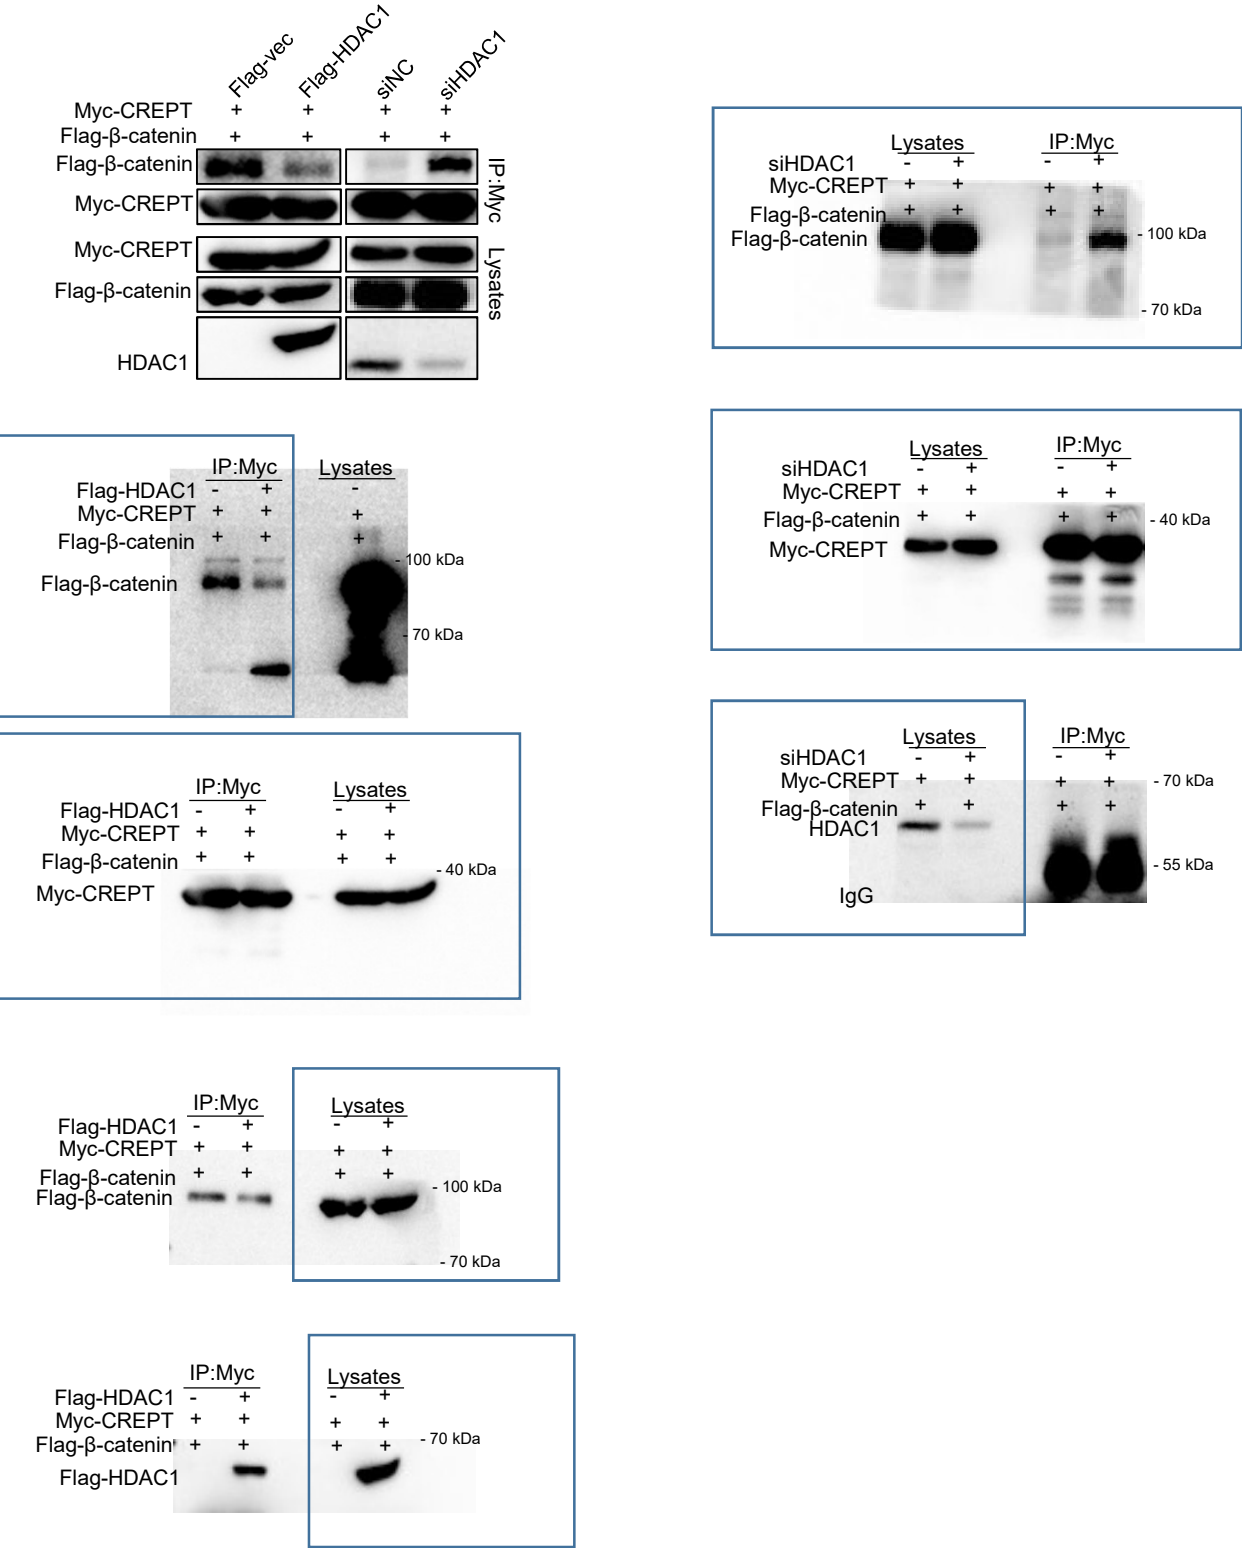

Figure S4J

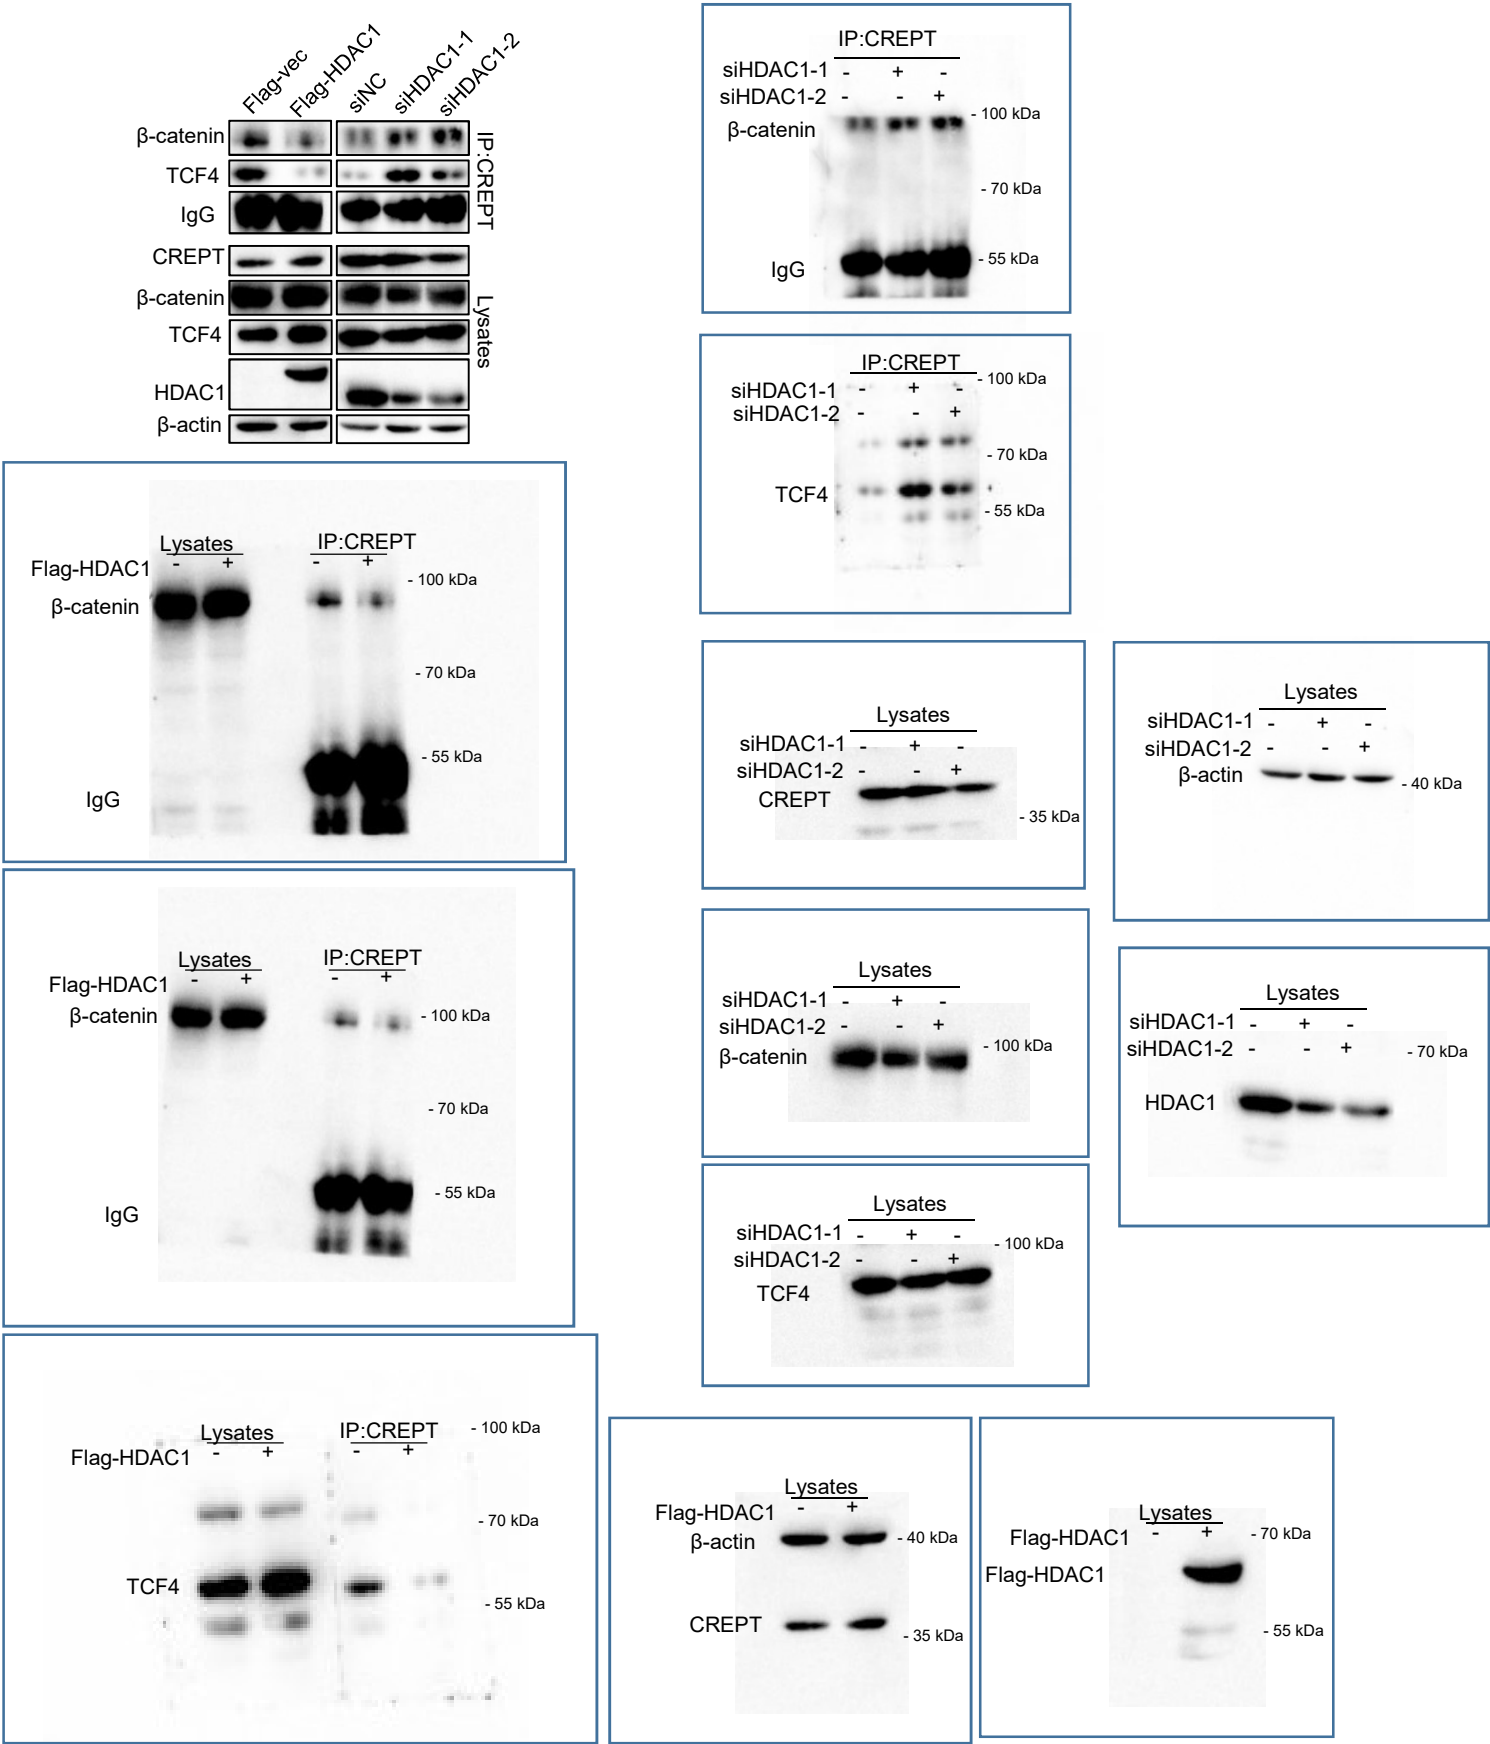

Figure S4K

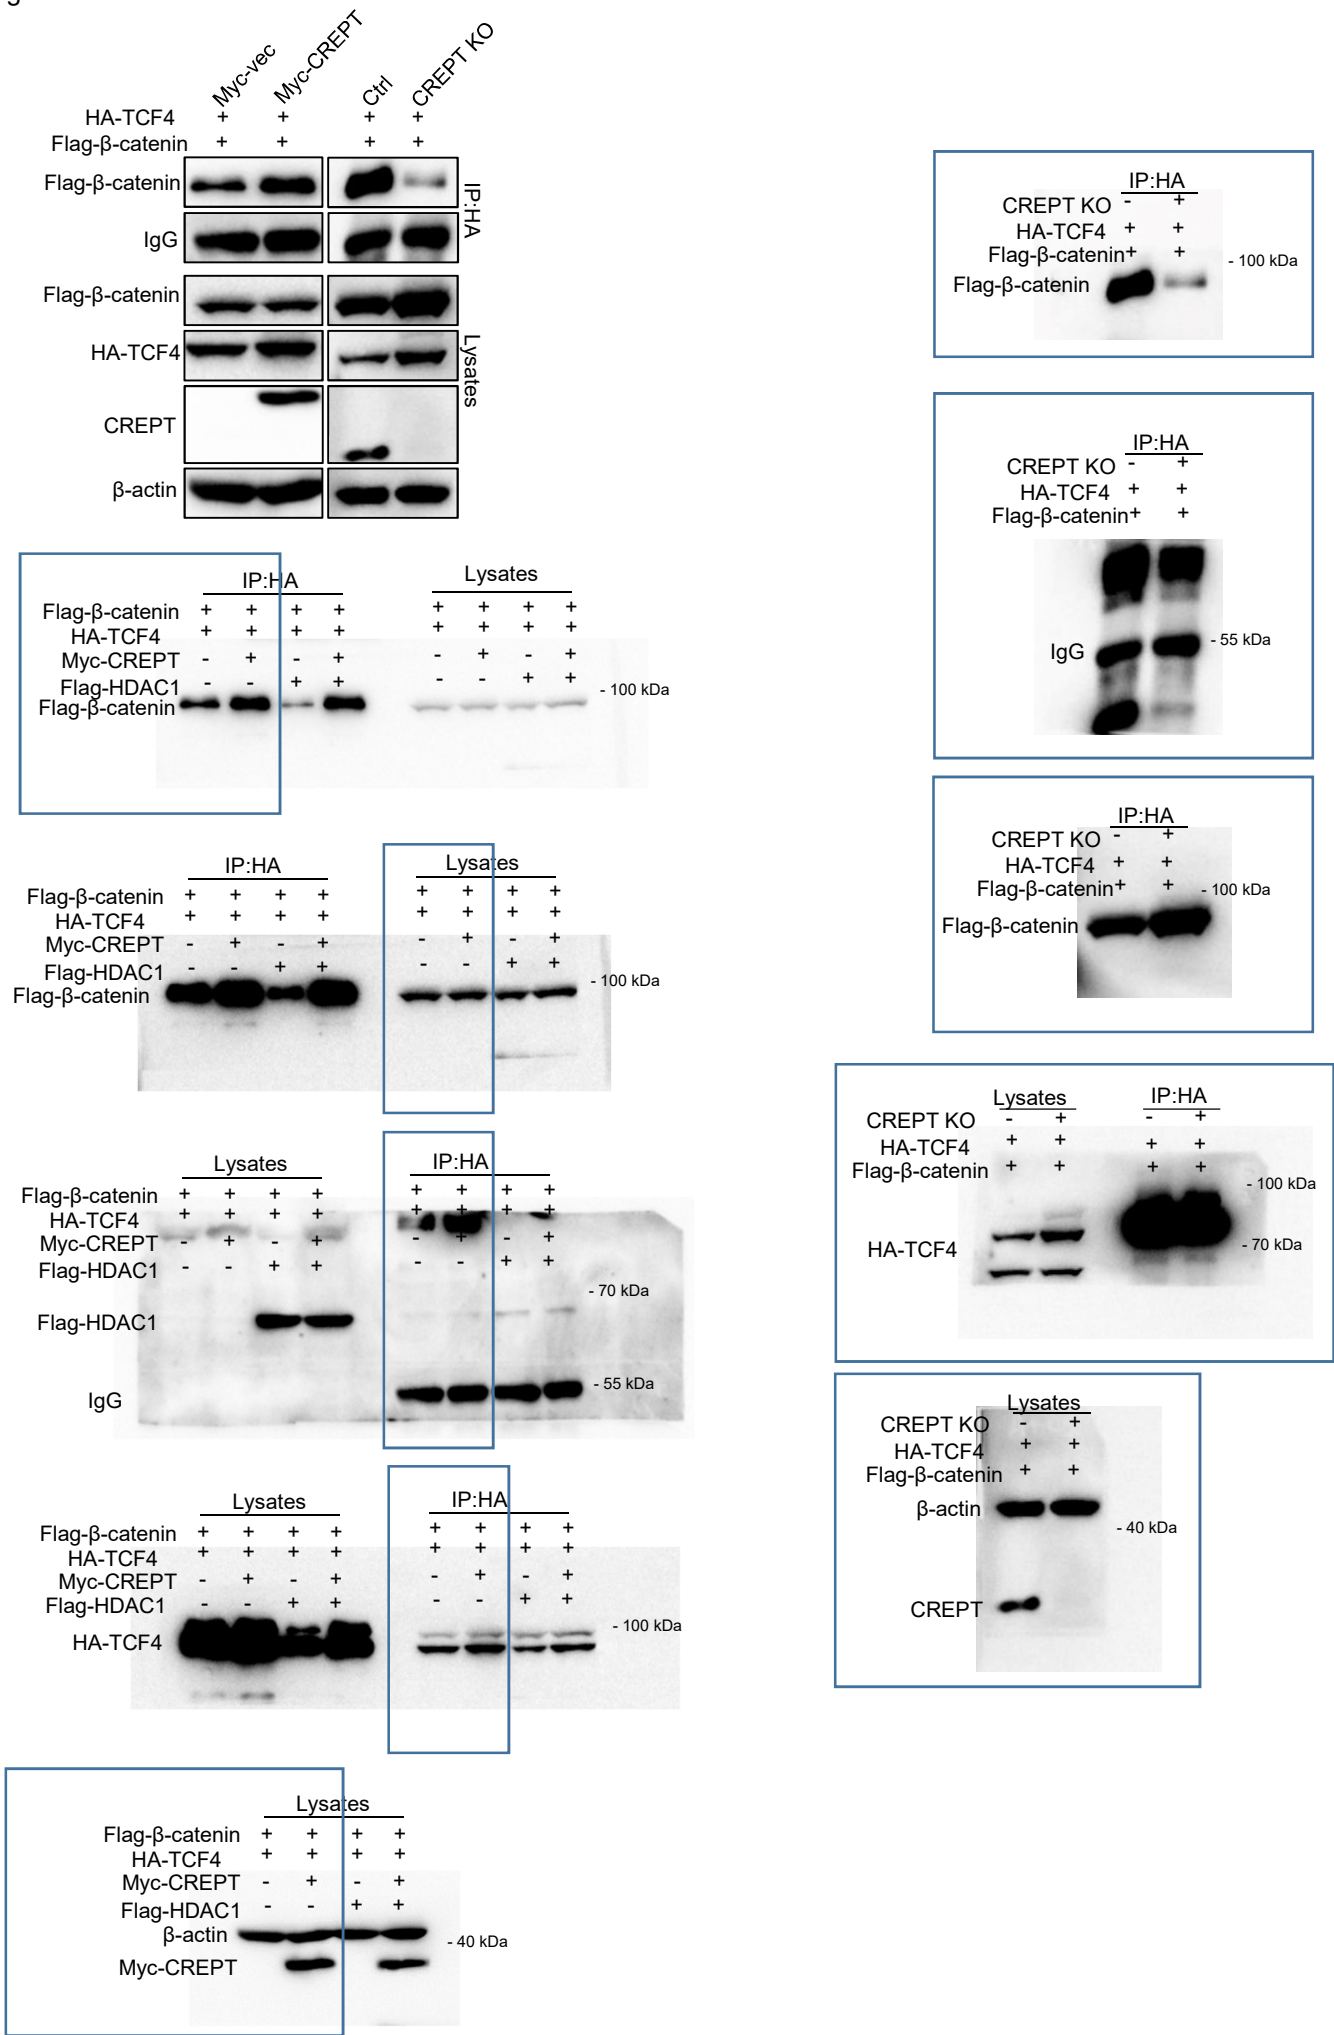



Figure S4L

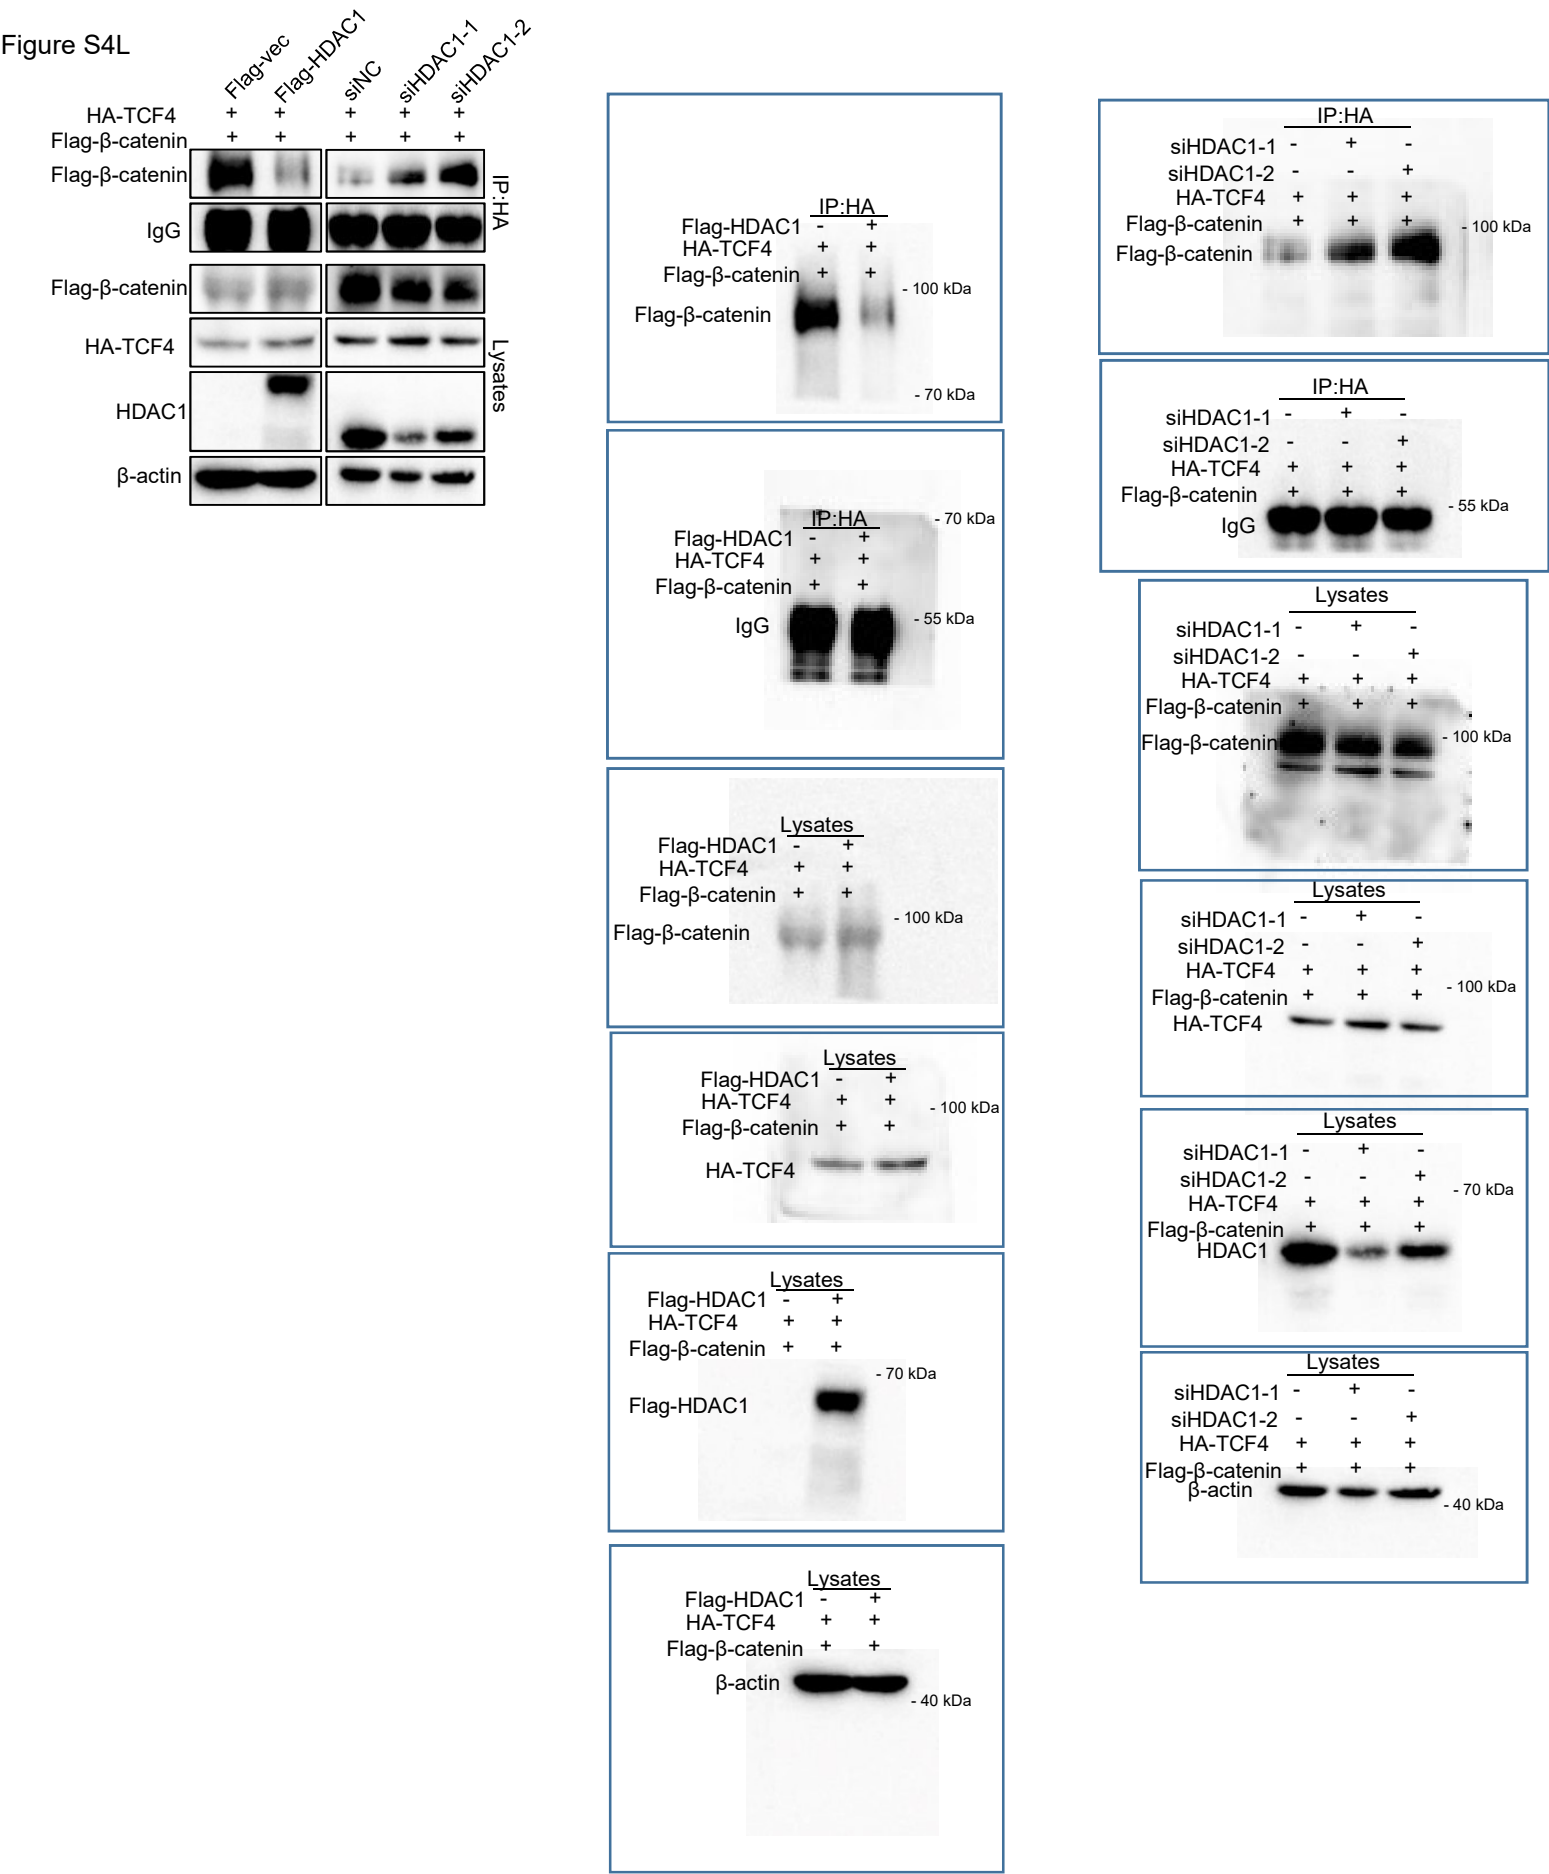

Figure S4M

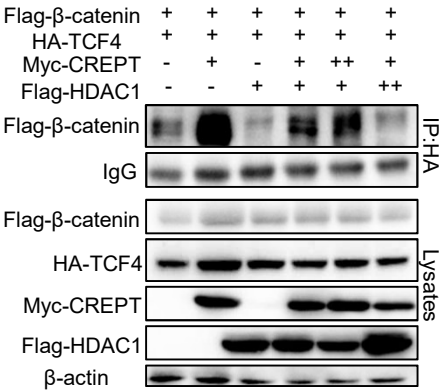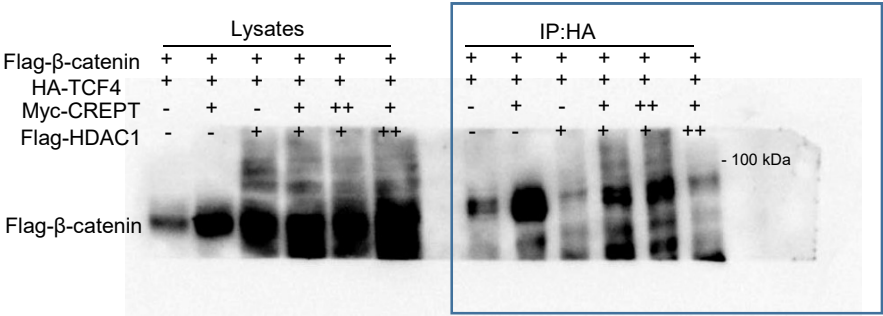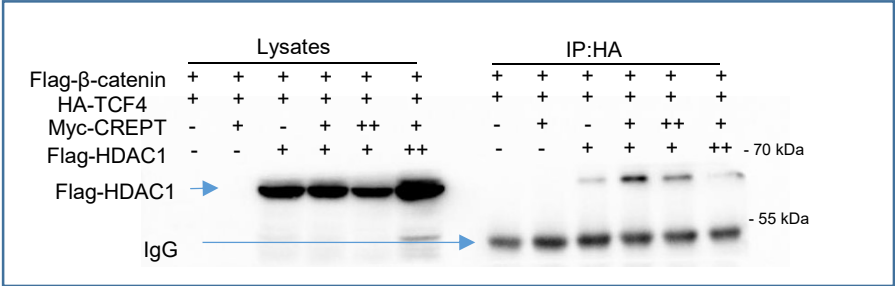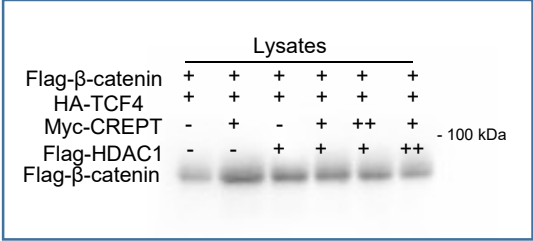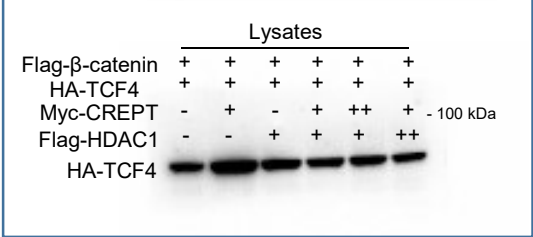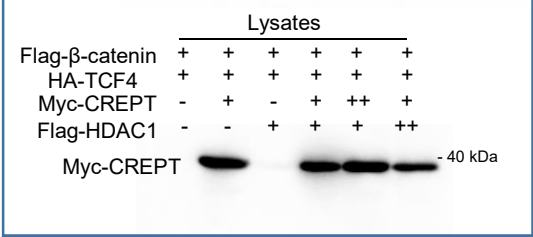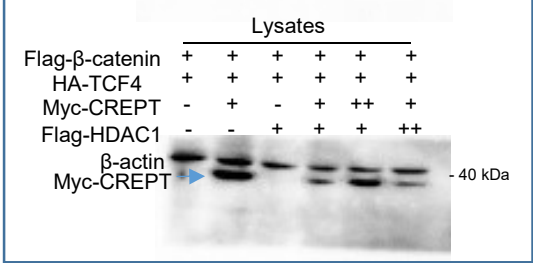

Figure S6A

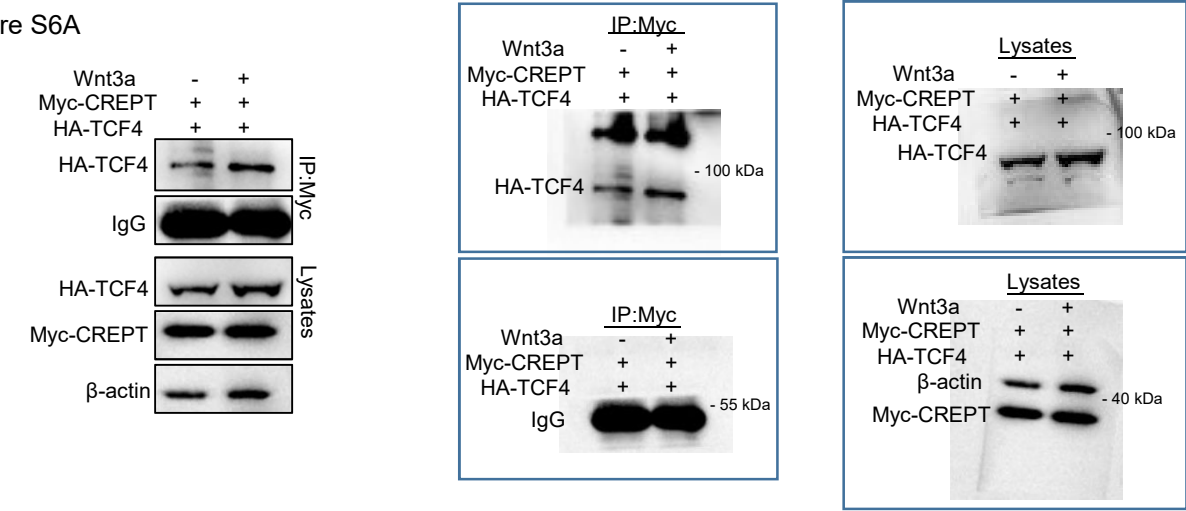

Figure S6B

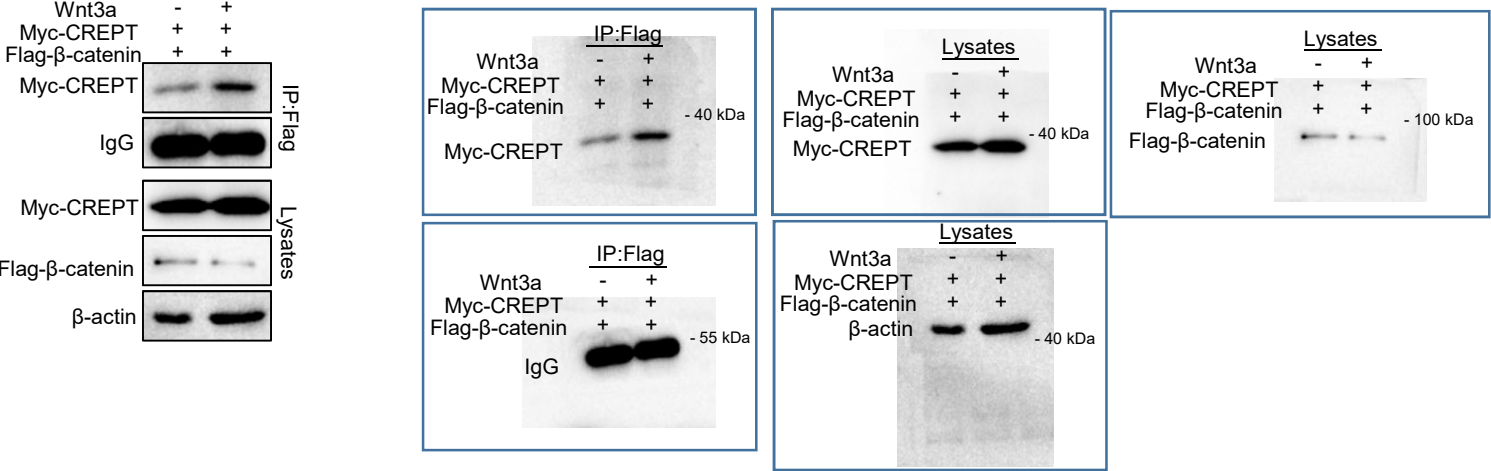

Figure S6C

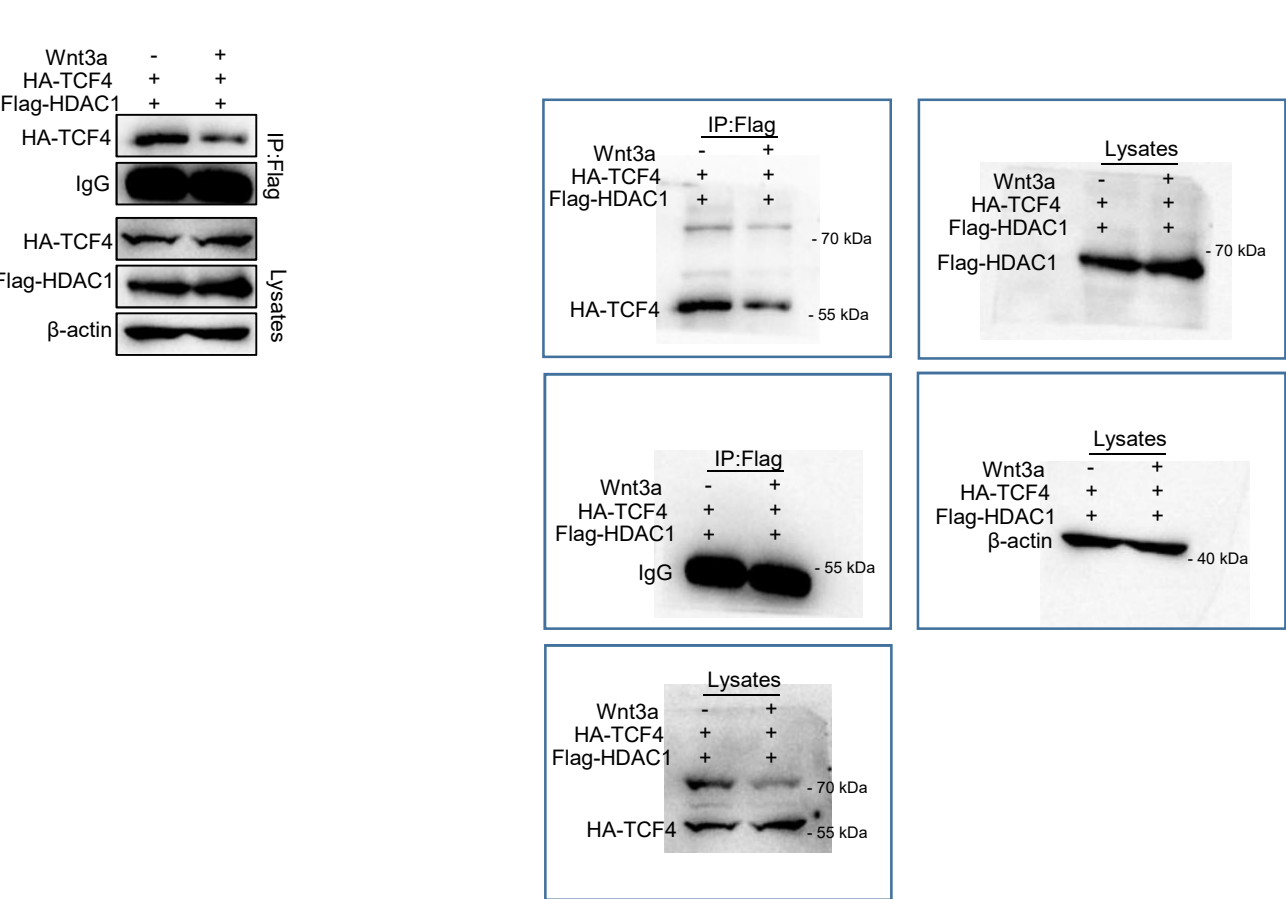



Figure S6F

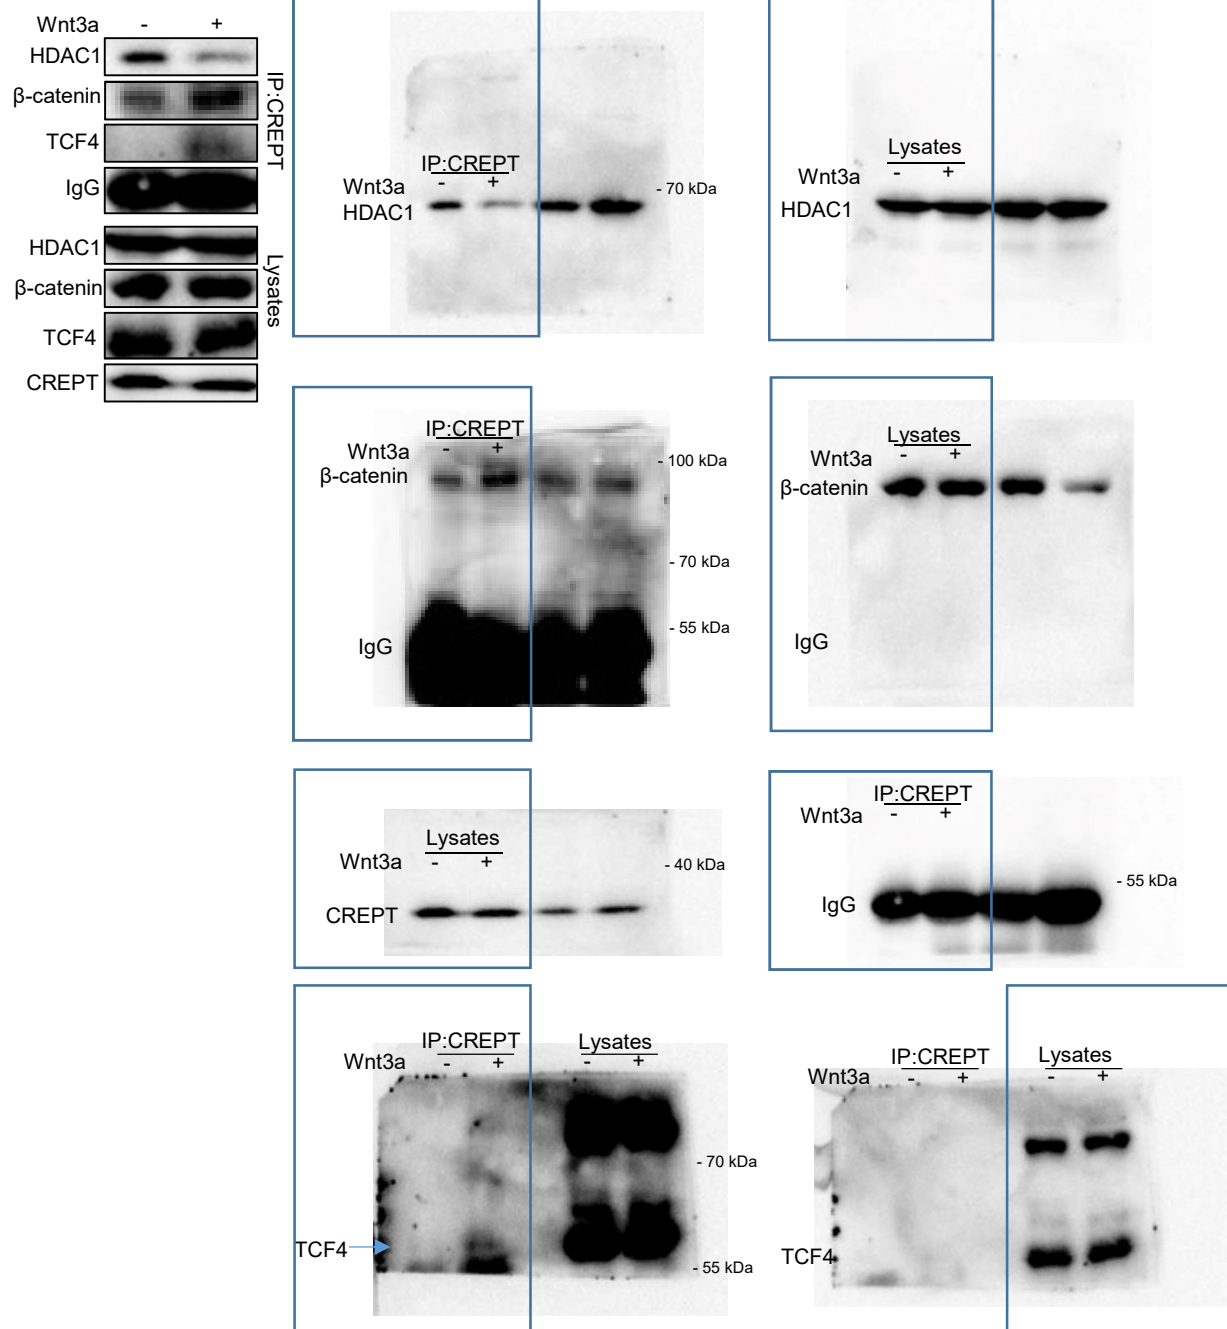

Supplement: s1 [file s1]
