# Supplementary material for: CREPT Disarms the Inhibitory Activity of HDAC1 on Oncogene Expression to Promote Tumorigenesis
Source: Cancers (Basel). 2022 Sep 30;14(19):4797. doi: 10.3390/cancers14194797 (PMC9562184; doi:10.3390/cancers14194797)
Supplement: Supplementary file 1 [file cancers-14-04797-s001.zip › cancers-1842508-supplementary/Supplementary List S1.xlsx]

## Sheet: Sheet1
Primers	Sequence
HDAC1-RT-F1	CTACTACGACGGGGATGTTGG
HDAC1-RT-R1	GAGTCATGCGGATTCGGTGAG
CREPT-RT-F1	GGCAAGAACGAAGTGTGTATGG
CREPT-RT-R1	CTGCCAGGGTAGTCGTCATC
β-actin-RT-F	GTGTGTGACAATGGCTCTGG
β-actin-RT-R	TCCCAGTTGGTGATGATGCC
CCND1-RT-F3	CAATGACCCCGCACGATTTC
CCND1-RT-R3	CATGGAGGGCGGATTGGAA
BMP4-RT-F1	ATGATTCCTGGTAACCGAATGC
BMP4-RT-R1	CCCCGTCTCAGGTATCAAACT
CLDN1-RT-F1	CCTCCTGGGAGTGATAGCAAT
CLDN1-RT-R1	GGCAACTAAAATAGCCAGACCT
VEGFA-RT-F1	AGGGCAGAATCATCACGAAGT
VEGFA-RT-R1	AGGGTCTCGATTGGATGGCA
RPRPD-RT-F1	CAGGGCTGACTGCAAACGA
PRPD-RT-R1	CTGCCACAATGTCTCGATGTC
p21-RT-F1	TGTCCGTCAGAACCCATGC
p21-RT-R1	AAAGTCGAAGTTCCATCGCTC
p27-RT-F1	AACGTGCGAGTGTCTAACGG
p27-RT-R1	CCCTCTAGGGGTTTGTGATTCT
p27-promoter-F	GATAAGTGCCGCGTCTAC
p27-promoter-R	GAAGTTTCTGCCATCCCT
PPARD-TBS-R	CTGGAGAGGAAACTCAGC
PPARD-TBS-F	GCCATGTATCATATGACC
p21 proximal-F	GGTGTCTAGGTGCTCCAGGT
p21 proximal-R	GCACTCTCCAGGAGGACACA
VEGFA-TBS-F2	GAGGGAAATTGCTGCATTCC
VEGFA-TBS-R	CCCATCCCATTCTTGCAT
CLDN1-TBS-F	CGCTGTTTACATGTCCTCAC
CLDN1-TBS-R	CCACTACATATCAAGTTGACCC
CCND1-TBS-F	CTCAGGGATGGCTTTTGGG
CCND1-TBS-R	ACTCCCCTGTAGTCCGTGTGACGTT
FGF18-TBS-F	CAAGATCAAAGACGGCG
FGF18-TBS-R	AGGCCTCCTTGCAAGCTA
